1 **Norovirus replication in human intestinal epithelial cells is restricted by the**  
2 **interferon-induced JAK/STAT signalling pathway *and* RNA Polymerase II**  
3 **mediated transcriptional responses.**

4

5 Myra Hosmillo<sup>a#</sup>, Yasmin Chaudhry<sup>a</sup>, Komal Nayak<sup>b</sup>, Frederic Sorgeloos<sup>a</sup>, Bon-  
6 Kyoung Koo<sup>c,d</sup>, Alessandra Merenda<sup>c\*</sup>, Reidun Lillestøl<sup>e</sup>, Lydia Drumright<sup>e</sup>,  
7 Matthias Zilbauer<sup>b</sup> and Ian Goodfellow<sup>a#</sup>

8

9 <sup>a</sup> Division of Virology, Department of Pathology, University of Cambridge,  
10 Cambridge, UK

11 <sup>b</sup> Department of Paediatrics, University of Cambridge, Cambridge, UK

12 <sup>c</sup> Wellcome Trust-Medical Research Council Stem Cell Institute, University of  
13 Cambridge, Cambridge, UK

14 <sup>d</sup> Institute of Molecular Biotechnology of the Austrian Academy of Sciences  
15 (IMBA), Vienna Biocenter (VBC), Dr. Bohr-Gasse 3, 1030 Vienna, Austria.

16 <sup>e</sup> Department of Medicine, Addenbrooke's Hospital, University of Cambridge,  
17 Cambridge, UK

18

19 **Running title: Restriction of HuNoV infection in intestinal mucosa**

20

21 #Address correspondence to Ian Goodfellow, [ig299@cam.ac.uk](mailto:ig299@cam.ac.uk) and Myra

22 Hosmillo, [mh749@cam.ac.uk](mailto:mh749@cam.ac.uk)

23 \*Present address:

24 Alessandra Merenda, Oncode Institute and Department of Cell Biology, Centre  
25 for Molecular Medicine, University Medical Centre Utrecht, 3584 CX Utrecht, the  
26 Netherlands

27

28 Abstract: 217 words

29 Text: 7,105 words

30

31 **Abstract**

32 Human noroviruses (HuNoV) are a leading cause of viral gastroenteritis  
33 worldwide and a significant cause of morbidity and mortality in all age groups.  
34 The recent finding that HuNoV can be propagated in B cells and mucosa derived  
35 intestinal epithelial organoids (IEOs), has transformed our capability to dissect  
36 the life cycle of noroviruses. Using RNA-Seq of HuNoV infected intestinal  
37 epithelial cells (IECs), we have found that replication of HuNoV in IECs results in  
38 interferon-induced transcriptional responses and that HuNoV replication in IECs  
39 is sensitive to IFN. This contrasts with previous studies that suggest that the  
40 innate immune response may play no role in the restriction of HuNoV replication  
41 in immortalised cells. We demonstrate that the inhibition of JAK1/JAK2  
42 enhances HuNoV replication in IECs. Surprisingly, targeted inhibition of cellular  
43 RNA polymerase II-mediated transcription was not detrimental to HuNoV  
44 replication, but enhanced replication to a greater degree compared to blocking  
45 of JAK signalling directly. Furthermore, we demonstrate for the first time that  
46 IECs generated from genetically modified intestinal organoids, engineered to  
47 be deficient in the interferon response, are more permissive to HuNoV  
48 infection. Together our work identifies the IFN-induced transcriptional  
49 responses restrict HuNoV replication in IECs and demonstrates that the  
50 inhibition of these responses by modifications to the culture conditions can  
51 greatly enhance the robustness of the norovirus culture system.

52

53

54 **Importance**

55 Noroviruses are a major cause of gastroenteritis worldwide yet the challenges  
56 associated with their growth culture has greatly hampered the development of  
57 therapeutic approaches and has limited our understanding of cellular pathways  
58 that control infection. Here we show that human intestinal epithelial cells, the  
59 first point of entry of human noroviruses into the host, limit virus replication by  
60 the induction of the innate responses. Furthermore we show that modulating  
61 the ability of intestinal epithelial cells to induce transcriptional responses to  
62 HuNoV infection can significantly enhance human norovirus replication in  
63 culture. Collectively our findings provide new insights into the biological  
64 pathways that control norovirus infection but also identify mechanisms to  
65 enhance the robustness of norovirus culture.

66

67

68 **Introduction**

69 The induction of the host innate response plays an essential role in the  
70 suppression of pathogen infection. The synthesis of interferons (IFN) and the  
71 subsequent signalling cascades that leads to the induction of IFN-stimulated  
72 genes (ISGs), determine the outcome of viral infection (1, 2). An understanding of  
73 the mechanisms underlying the interplay between pathogens and innate immune  
74 responses is vital to understanding viral pathogenesis and can greatly aid the  
75 identification of potential therapeutic and/or preventive strategies.

76

77 Human noroviruses (HuNoV) are widely recognised as the leading cause of viral  
78 gastroenteritis worldwide (3). Noroviruses are classified into at least seven  
79 genogroups based on the sequence of the major capsid protein VP1 and regions  
80 within ORF1 (3–5). HuNoVs belong to one of three norovirus genogroups (GI,  
81 GII, or GIV), which are further divided into >25 genetic clusters or genotypes (6–  
82 8). Epidemiological studies reveal that over 75% of confirmed human norovirus  
83 infections are associated with HuNoV GII (9, 10). Whilst norovirus gastroenteritis  
84 typically results in an acute and self-limiting disease, the socioeconomic impact in  
85 both developed and developing countries is estimated to be more than \$60.3  
86 billion per annum (11). HuNoV infection is particularly severe and prolonged in  
87 immunocompromised patients, including young children, elderly, or patients  
88 receiving treatment for cancer. In these cases infections can last from months to  
89 years (12, 13).

90

91 Our understanding of the molecular mechanisms that control HuNoV infection  
92 has been limited by the lack of robust culture systems that facilitate the detailed  
93 analysis of the viral life cycle. As a result, murine norovirus (MNV) and other  
94 members of the *Caliciviridae* family of positive sense RNA viruses, such as feline  
95 calicivirus (FCV) and porcine sapovirus (PSaV), are often used as surrogate  
96 models (14–17). MNV, FCV and PSaV can all be efficiently cultured in  
97 immortalised cells and are amenable to reverse genetics (16–20). These model  
98 systems have been critical to understanding many aspects of the life cycle of  
99 members of the *Caliciviridae* (15).

100

101 Recent efforts have led to the establishment of two HuNoV culture systems  
102 based on immortalised B cells (21, 22) and intestinal epithelial cells (IECs)  
103 generated from biopsy-derived human intestinal epithelial organoids (IEOs) (23).  
104 Whilst authentic replication of HuNoV can be observed in both the B-cell and  
105 IEC-based culture systems, repeated long-term passage of HuNoV and the  
106 generation of high titre viral stocks is not possible, suggesting that replication is  
107 restricted in some manner. In the current study we sought to better understand  
108 the cellular response to HuNoV infection and to identify pathways that restrict  
109 HuNoV replication in organoid-derived IECs. Using RNA-Seq we observed that  
110 HuNoV infection of IECs results in an interferon-mediated antiviral transcriptional  
111 response. We show for the first time that HuNoV replication in IECs is sensitive to  
112 both Type I and III interferon and that HuNoV replication is restricted by virus-  
113 induced innate response. Pharmacological inhibition of the interferon response  
114 or genetic modification of organoids to prevent the activation of the interferon

115 response significantly improved HuNoV replication in IECs. Furthermore, we  
116 show that ongoing HuNoV replication is enhanced by the inhibition of RNA Pol II  
117 mediated transcription. Overall this work provides new insights into the cellular  
118 responses to HuNoV infection of the gut epithelium and identifies modifications to  
119 the HuNoV culture system that significantly enhances its utility.

120

121

## 122 **Materials and Methods.**

123 **Stool samples.** Stool specimens were anonymized with written consent from  
124 patients at Addenbrooke's Hospital, Cambridge, who tested positive of HuNoV  
125 infection. Stool samples were diluted 1:10 (wt/vol) with phosphate buffered saline  
126 (PBS) and processed as described (23). Briefly, 10% stool suspensions were  
127 vigorously vortexed for 1 min and sonicated three times for 1 min (50/60 Hz,  
128 80W). Homogenous fecal suspensions were centrifuged at 1,500xg for 10 min at  
129 4°C. The supernatants were serially passed through 5 µm, 1.2 µm, 0.8 µm, 0.45  
130 µm and 0.22 µm filters (Millex-GV syringe filter units). Stool filtrates were  
131 aliquoted and stored at -80°C until used.

132

133 **Human intestinal organoids.** Following ethical approval (REC-12/EE/0482) and  
134 informed consent, biopsies were collected from the proximal duodenum (D) or  
135 terminal ileum (TI) from patients undergoing routine endoscopy. All patients  
136 included had macroscopically and histologically normal mucosa. Biopsy samples  
137 were processed immediately and intestinal epithelial organoids generated from

138 isolated crypts following an established protocol as described previously (23–25).  
139 Intestinal organoids were grown in proliferation media (Table S1) as described  
140 (24). Organoids were typically grown for 7-9 d prior to passage at ratios of 1:2 to  
141 1:3.

142

143 Following the establishment of organoid cultures, differentiated IEC monolayers  
144 were generated on collagen-coated wells in differentiation media (Table S1) as  
145 described (23). Following 5 days of differentiation, confluent monolayers of  
146 differentiated IECs were infected. Differentiation was assessed by RT-qPCR at  
147 various time post infection by assessing the levels of the stem cell marker LGR5,  
148 a mature enterocyte marker alkaline phosphatase (ALP) and epithelial cell  
149 marker villin (VIL). Data were normalised to the housekeeping gene  
150 hypoxanthine phosphoribosyltransferase 1 (HPRT1).

151

152 **Cell lines and reagents.** L-WNT 3A expressing cell lines were used to produce  
153 WNT conditioned media as a component of the proliferation media and were  
154 propagated in low glucose DMEM (Life technologies), 10% fetal calf serum  
155 (FCS), 1% penicillin-streptomycin (P/S) and Zeocin (125 µg/ml) at 37°C with 5%  
156 CO<sub>2</sub>. WNT-conditioned media was collected from cells grown in the absence of  
157 Zeocin. The activity of WNT3a in conditioned media was assessed using a  
158 luciferase reporter assay reliant on a Wnt3A responsive promoter (HEK 293 STF,  
159 ATCC CRL-3249).

160

161 293T-RSPO-V5 cells were used to produce the R-Spondin 1 (RSPO1)



162 conditioned media. 293T-RSPO-V5 cells were propagated in DMEM (Life  
163 technologies), 10% fetal calf serum (FCS), 1% penicillin-streptomycin (P/S) and  
164 Zeocin (300 µg/ml) at 37°C with 5% CO<sub>2</sub>. RSPO1-conditioned media were  
165 collected from passage of cells in conditioned media containing DMEM/F12 (Life  
166 technologies), 1% penicillin-streptomycin (P/S), 10mM HEPES (Life  
167 technologies), and 1x glutamax (Life technologies).

168

169 Components of the proliferation and differentiation media are described in Table  
170 S1. The commercial sources of Interferons (IFNαA/D, Sigma; IFNβ1, IFNλ1, and  
171 IFNλ2, Peprotech) and IFN inhibitors Ruxolitinib (Invivogen) and Triptolide  
172 (Invivogen) are detailed in Table S2.

173

174 **Lentivirus vector particle production and transduction.** Lentivirus transfer  
175 vectors encoding the BVDV NPro and PIV5 V proteins were a gift from Professor  
176 Steve Goodbourn (St. George's Hospital, University of London). The transfer  
177 vectors were used to generate vesicular stomatitis virus G-protein-pseudotyped  
178 lentiviral particles by transfection of 293T cells with psPAX2 and pMD2.G helper  
179 plasmids. Human IEOs were then transduced with lentivirus-containing  
180 supernatants following published protocols (18). Transduced organoids were  
181 selected with puromycin (2 µg/ml) and organoid clones were selected by limiting  
182 dilution and subsequent functional analysis.

183

184 **HuNoV infection.** Differentiated monolayers in 48-well plates were infected in  
185 biological duplicates or triplicate as described in the text. HuNoV stool filtrates

186 containing  $\sim 1 \times 10^6$  viral RNA copies, determined by RT-qPCR, were added to  
187 each well and incubated 37 °C for 2 h, prior to being washed twice with serum-  
188 free media and overlaid with 250  $\mu$ L of differentiation media containing 200  $\mu$ M  
189 GCDCA. Where required, wells were supplemented with either DMSO, IFN or  
190 pharmacological inhibitors as described in the text. Samples were typically  
191 harvested at 48 hours post infection for analysis.

192

193 Inactivated HuNoV-containing stool filtrates were prepared placing stool filtrate  
194 into multiple 24-well plates to a fluid depth of 10 mm and exposing to 4000 mJ  
195 from a UV source for 12 min at 4 °C. Loss of viral infectivity was confirmed by  
196 infection of monolayers and by comparison of viral titres observed after 48 hours  
197 post infection with that obtained using the well-characterised RNA polymerase  
198 inhibitor 2-CMC (26).

199

200 **qRT-PCR and qPCR analysis.** Gene-specific primers and probes against the  
201 cellular mRNAs HPRT, LGR5, ALP, and VIL (Thermo Fisher Scientific) were  
202 used to evaluate differentiation by RT-qPCR. Samples were analysed by  
203 technical duplicate qPCR reactions and the results averaged.

204

205 HuNoV GII specific primers previously reported (27) were used in Taqman-based  
206 qRT-PCR assay to detect HuNoV replication in organoid cultures. The levels of  
207 HuNoV mRNA were determined based on absolute quantitation against a  
208 standard curve generated using *in vitro* transcribed RNA from a full length cDNA  
209 clone of a GII.4 HuNoV. Each individual biological sample was analysed by qRT-

210 PCR in technical duplicate alongside additional no template negative controls.

211 Data were collected using a ViiA 7 Real-Time PCR System (Applied Biosystems).

212

213 **RNA library preparation and sequencing.** Total cellular RNA was extracted

214 from IECs using Trizol (Invitrogen) and genomic DNA was removed by DNase I

215 digestion (TURBO DNA-free™ Kit, Ambion, AM1907). RNA integrity was

216 assessed via an Agilent 2200 TapeStation system using RNA ScreenTape

217 reagents (Agilent Technologies, catalog number: 5067-5576/77). Libraries were

218 prepared for sequencing by Cambridge Genomics Services, 300 ng of total RNA

219 using a TruSeq stranded mRNA kit (Illumina Technologies, catalog number:

220 20020595). Libraries were quantified by qPCR, pooled and sequenced with 75

221 basepair single reads to a depth ranging from 13 to 55 million reads per sample

222 on a Illumina NextSeq 500 using a High Output 75 cycles kit (Illumina, catalog

223 number: FC-404-2005).

224

225 **Data analysis.** Raw reads were inspected with FastQC. Adapters and low quality

226 sequences were removed using Trimmomatic version 0.33 using the following

227 parameters:ILLUMINACLIP:TruSeq3-SE:2:30:10LEADING:3TRAILING:3SLIDIN

228 GWINDOW:4:15 MINLEN:36. Transcript level quantification for each sample was

229 obtained using the kallisto software (28) against the human transcriptome

230 GRCh38.p12 (Ensembl release v92; accessed 22/03/2018) and genes with

231 average transcripts per million less than 1 in both control and virus infection

232 conditions were excluded from downstream analysis. Read counts were  
233 normalized using the trimmed mean of M-values normalization method (29) and  
234  $\log_2$  count per million (CPM) were obtained using calcNormFactors and voom  
235 (30) functions of edgeR (29) and limma (31) packages, respectively. Student's t-  
236 tests were then applied for each transcript. Finally, p-values were adjusted for  
237 false discoveries due to simultaneous hypotheses testing by applying the  
238 Benjamini–Hochberg procedure (FDR) (32) . Transcripts with a FDR lower than  
239 0.01 and  $\log_2$ FC greater than 1 (FC=2) were considered as differentially  
240 expressed. Heatmap of gene expression for significant genes across  
241 comparisons was generated using the R package pheatmap version 1.0.10.  
242 Levels of expression change are represented by a colour gradient ranging from  
243 blue (low increase in gene expression) to red (high increase in gene expression).  
244 Gene ontology term and Reactome pathway enrichment analyses were  
245 performed with the clusterProfiler R package version 3.8.1 (33) and represented  
246 using the R package pheatmap as above.

247 The RNA-Seq data obtained in this study have been deposited the Gene  
248 Expression Omnibus (GEO, <http://www.ncbi.nlm.nih.gov/geo>) with the accession  
249 number GSE117911. Reviewer access can be obtained by entering the token  
250 "mholyagyrrurvof". In addition, all sequence reads were deposited in the NCBI  
251 Sequence Read Archive Database (SRA, <http://www.ncbi.nlm.nih.gov/sra>) and  
252 are associated with the accession number PRJNA483555.

253

254 **Statistical analysis and software.** Statistical analyses were performed on

- 255 triplicate experiments using the two-tailed Student t-test (Prism 6 version 6.04).
- 256 Figures were generated using Inkscape and Prism 8 version 8.0.2.

257 **Results**

258 **Human norovirus replicates productively in differentiated intestinal**  
259 **epithelial cells from the human proximal and distal small bowel**

260

261 Building on previous studies reporting the replication of HuNoV in IECs, we set  
262 out to better understand the cellular response to HuNoV infection and to identify  
263 pathways that restrict HuNoV replication in IECs. We established IEO cultures  
264 using mucosal biopsies obtained from several gut segments of the small  
265 intestine, the proximal duodenum and terminal ileum. Given the importance of  
266 fucosyltransferase expression on HuNoV susceptibility (34–36), lines were  
267 established from FUT2 positive individuals. Intestinal crypt cells were isolated  
268 and used to generate small IEOs (Fig. 1A). The 3D-organoid structures are  
269 allowed to self-organize and differentiate within Matrigel using optimized  
270 proliferation medium as described (Table S1) (24). The established organoid  
271 lines were typically cultured for 7-9 d and expanded at passage ratios of 1:2 or  
272 1:3. As expected, during the first three days of culture the intestinal organoids  
273 initially formed small cystic structures with a central lumen, lined with epithelial  
274 cells (Fig. 1A). By day 5 more convoluted structures formed, the nature of which  
275 varied from line to line (Fig. 1A).

276

277 To assess the replication efficiency of HuNoV replication in differentiated IECs, 7-  
278 9 day-old organoids were plated onto collagen-coated plates, then Wnt and RSpO  
279 removed to drive differentiation. To examine the degree of differentiation and to  
280 confirm the presence of enterocytes in the monolayers, we examined the mRNA

281 levels of LGR5 and ALP in IEC monolayers generated from both duodenum and  
282 ileum (Fig. 1B and 1C). As shown in Fig. 1B, the levels LGR5 mRNA in proximal  
283 duodenum decreased by ~294- to 384-fold, whereas ALP mRNA increased by  
284 1200- to 45000-fold following the removal of Wnt and RSpO. Similarly, the  
285 differentiation of IECs derived from the terminal ileum was confirmed by an  
286 increased in ALP mRNA and a concomitant decreased in LGR5 (Fig. 1C). These  
287 results confirmed that the IEC monolayers had undergone differentiation and  
288 confirmed the presence of enterocytes in the differentiated monolayers.

289

290 To assess HuNoV replication in the human IEC monolayers, filtered stool  
291 samples containing genogroup II HuNoV strains were inoculated onto  
292 differentiated monolayers generated from either duodenum and terminal ileum-  
293 derived intestinal organoids. Following a 2 hour adsorption period, the inoculum  
294 was removed by washing and the monolayers maintained in differentiation media  
295 with the bile acid GCDCA for 2d. While previous observations indicated that  
296 some strains of HuNoV do not require bile acids for infection, GCDCA was  
297 included to maintain a physiologically relevant environment and to control for any  
298 effect of bile acids on gene expression. Replication of HuNoV was then assessed  
299 by comparing viral RNA levels present in cultures at 2 h post infection (Day 0,  
300 D0) to 48 hours post infection (Day 2, D2). In duodenal IEC monolayers, viral  
301 RNA levels of both GII.3 and GII.4 HuNoV strains increased by ~1.5 to 2 log<sub>10</sub>  
302 over the 2 day period (Fig. 1D). Similar levels of viral replication were observed  
303 in IEC monolayers derived from terminal ileum organoids, resulting in ~1.3 to 3.5  
304 log<sub>10</sub> increases in viral RNA levels (Fig. 1D).

305

306 **Norovirus infection of human intestinal epithelial cells induces the innate**  
307 **immune response**

308

309 The development of a stem-cell derived culture system for HuNoV provides the  
310 first opportunity to characterize the cellular pathways that restrict norovirus  
311 replication at their primary site of entry into the host, namely the gut epithelium  
312 (23). Whilst a previous report suggested that replication of HuNoV did not induce  
313 a robust interferon response in immortalized cells (37), inefficient replication and  
314 mutations commonly found in cell lines that compromise their ability to respond to  
315 viral infection, may have confounded this observation. Whilst there are limited  
316 examples in the literature, there is evidence that natural HuNoV infection results  
317 in the production of pro- and anti-inflammatory cytokines (38). We have also  
318 recently reported that HuNoV replication in Zebrafish also resulted in a  
319 measurable innate response (39).

320

321 To examine the effect of HuNoV replication on the stimulation of the IFN-induced  
322 innate response, we initially assessed the mRNA levels of two candidate  
323 interferon stimulated genes (ISGs), human viperin and ISG 15. Viperin and  
324 ISG15 mRNAs increased significantly following HuNoV infection (Fig. 2A). To  
325 confirm that induction was specifically caused by active HuNoV replication, UV-  
326 inactivated HuNoV stool filtrates were used alongside to control for non-specific  
327 effects. In contrast to live virus inoculated IEC monolayers, induction of viperin  
328 and ISG15 was not seen in cells infected with UV-inactivated virus, confirming



329 this induction as virus-specific (Fig.2A). These results indicate for the first time  
330 that active replication of HuNoV in IECs readily stimulates the interferon-induced  
331 innate response.

332

333 To examine whether HuNoV replication in IECs was in fact sensitive to IFN and  
334 therefore by extension, likely restricted by the virus-induced response, we  
335 examined the effect of IFN pretreatment on the replication of HuNoV GII.4 in  
336 IECs. The addition of either IFN $\beta$ 1 or IFN $\lambda$ 1/2 had an inhibitory effect on GII.4  
337 HuNoV replication in IECs derived from terminal ileum organoids. This result  
338 confirms that HuNoV infection of IECs is sensitive to antiviral effects of type I  
339 (IFN $\beta$ 1) or III (IFN $\lambda$ 1/2) IFN (Fig. 2B). We therefore hypothesized that the  
340 HuNoV-induced transcriptional responses may restrict HuNoV replication in IECs.

341

342

343 **Human norovirus replication in intestinal epithelial cells activates the IFN-**  
344 **induced JAK/STAT signalling pathway**

345

346 The impact of norovirus infection on host gene expression in IECs and the  
347 magnitude of the IFN response during HuNoV infection, was examined by  
348 performing RNA-Seq analysis of infected IEC monolayers. IECs from two  
349 independent terminal ileum-derived organoid cultures were mock-infected,  
350 infected with a patient-derived GII.4 HuNoV strain, or with a UV-inactivated  
351 sample of the same inoculum. Two days post infection, total cellular RNA was  
352 extracted and processed for RNA-Seq analysis.

353

354 Robust infection of the cultures was evident from the increase in viral RNA levels  
355 over time with a 2753-fold and 498-fold increase in HuNoV RNA seen in the  
356 terminal ileum lines TI365 and TI006 respectively (Fig. 3A and 3B). As expected,  
357 very little increase in viral RNAs were observed in IEC monolayers inoculated  
358 with UV-inactivated stool filtrate (Fig. 3A and 3B). To identify genes differentially  
359 regulated in the response to productive HuNoV replication, pairwise gene  
360 comparisons from mock-infected, IEC monolayers infected with UV-inactivated  
361 HuNoV or HuNoV infected organoids were performed (Fig. 3C-3H). Three  
362 biological repeats of each condition was analysed by RNA-Seq as described in  
363 the methods. A total of 70 genes were found to be differentially regulated in GII.4  
364 HuNoV IECs derived from organoid line TI365 when compared to the mock  
365 infected sample, with 69 increasing and 1 decreasing in their expression level  
366 (Fig. 3C, Table S3). Comparing the infected TI365 samples to the samples  
367 infected with UV-inactivated inoculum resulted in a slight increase in the number  
368 of differentially regulated genes; 76 in total with 73 increased and 3 decreased  
369 (Fig. 3E, Table S3). UV inactivation of the sample resulted in a near complete  
370 ablation of the transcriptional response when compared to the mock infected  
371 cells with very few reaching statistical significance, confirming that the  
372 transcriptional signature was virus-specific (Fig. 3G and 3H). In comparison, 162  
373 genes were differentially regulated in GII.4 HuNoV-infected IECs derived from  
374 organoid line TI006 in comparison to mock infected cells; 9 decreased in  
375 expression and 153 increased (Fig. 3D, Table S3). The number of differentially  
376 regulated genes were reduced when compared to the IECs infected with UV-

377 inactivated inoculum, 142 in total (Fig. 3F, Table S3). Similarly to our observations  
378 with GII.4 HuNoV infection of TI365, infection of TI1006 with the UV-inactivated  
379 inoculum resulted in a near complete loss of the transcriptional response.

380

381 In order to validate the results from the RNA-Seq analysis, we selected 7  
382 differentially regulated genes and performed RT-qPCR on the same biological  
383 samples. We observed a strong correlation between RT-qPCR and RNA-Seq  
384 results confirming the accuracy of the expression data obtained by RNA-Seq  
385 (Fig. 3I and 3J).

386

387 Transcription factor enrichment analysis unambiguously identified STAT1 and  
388 STAT2 binding sites as highly enriched in promoter region of genes whose  
389 expression is significantly regulated following infection of human intestinal  
390 organoids (Fig. 4B). This strongly suggested that the JAK-STAT signaling  
391 pathway is activated following HuNoV infection. In agreement, gene ontology  
392 analysis highlighted a profound induction of type I interferon signaling in the  
393 transcriptomic response to HuNoV infection (Fig. 4C). In addition, Reactome  
394 pathway analysis carried out on the same set of genes further confirmed the  
395 involvement of interferon signaling in response to HuNoV infection (Fig. 4D).

396

397 Comparing the genes differentially expressed in response to HuNoV infection  
398 with the Interferome database revealing that 94% (66) and 86% (140) of these  
399 genes were categorized as ISGs in organoid lines TI365 and TI006 respectively.

400 Overall, these results demonstrated that HuNoV infection is readily sensed by

401 IECs and that the IFN-induced JAK/STAT signalling pathway is likely activated  
402 during HuNoV infection and/or active replication.

403

404 **Genetic modification of intestinal organoids to ablate interferon induction**  
405 **or interferon signaling enhances HuNoV replication in IECs.**

406 To further examine the impact of IFN induction and the IFN signaling pathway on  
407 the restriction of HuNoV replication in IECs, we used lentiviral vectors to express  
408 viral innate immune antagonists to generate interferon deficient intestinal  
409 organoid lines. Lentiviral vectors were used to drive constitutive expression of  
410 either BVDV NPro or PIV5 V proteins, two well-characterized viral innate immune  
411 antagonists in a duodenum-derived organoid line (D196). In brief, the BVDV  
412 NPro protein originates from a non-cytopathic, persistent biotype of BVDV which  
413 effectively blocks IFN production by degrading IRF3, thereby preventing the  
414 activation of the innate immune system (40, 41). The PIV5 V protein instead  
415 targets IFN production as well as antiviral signaling by targeting STAT1, MDA5  
416 and LGP2 for proteasomal degradation (42–45). To confirm that transduced  
417 proteins were functional, the expression levels of STAT1 and IRF3 were  
418 examined by western blotting. Whilst the STAT1 protein was present in the non-  
419 transduced control organoid line and BVDV NPro-expressing organoid lines, no  
420 STAT1 protein was observed in PIV5 V-expressing cells (Fig. 5A). The IRF3  
421 protein was not detected in BVDV NPro-expressing cells, but was present in  
422 control and PIV5 V-transduced cells (Fig. 5A), confirming NPro protein  
423 functionality.

424

425 To verify the ability of NPro and V proteins to inhibit IFN induction and IFN  
426 signaling in the intestinal epithelium, IECs derived from stably transduced  
427 organoid lines were transfected with polyinosinic acid:polycytidylic acid [poly(I:C)]  
428 or treated with recombinant universal type I IFN $\alpha$ A/D a hybrid between human  
429 IFN $\alpha$  A and D. The levels of IFN $\beta$ , IFN $\lambda$ 1 and two representative ISGs, viperin  
430 and ISG15, then quantified by RT-qPCR. Following poly(I:C) transfection,  
431 elevated levels of IFN $\beta$ , IFN $\lambda$ 1, viperin and ISG15 mRNAs were observed in  
432 control IECs transduced with the empty vector as expected (Fig. 5B-5E). In  
433 comparison, the levels of IFN $\beta$  and IFN $\lambda$ 1 mRNAs induction was significantly  
434 lower in BVDV NPro- and PIV5 V-expressing cells, as were the mRNAs for  
435 viperin and ISG15 mRNAs (Fig. 5B-5E). Following treatment with type I IFN,  
436 IECs expressing the BVDV NPro or PIV5 V proteins showed significantly reduced  
437 IFN $\beta$  and IFN $\lambda$ 1 mRNA induction levels when compared with the control cells  
438 (Fig. 5B and 5C). Viperin and ISG15 mRNAs were not induced in IFN-treated  
439 PIV5 V-transduced IECs, confirming the impact of the V-protein in IFN signaling  
440 (Fig. 5D and 5E). These data further confirm that the IECs were IFN competent  
441 and that the BVDV NPro and PIV5 V proteins could efficiently block IFN induction  
442 and signaling in IECs.

443

444 The ability of HuNoV to infect IECs from the transduced organoid line was then  
445 investigated. Infection of the non-transduced D196 line with a GII.3 HuNoV strain  
446 resulted in only modest levels of virus replication; a ~6-fold increase in viral RNA  
447 over 48 hours in the control non-transduced line was observed suggesting that  
448 the replication of this isolate in the D196 line was inefficient (Fig. 5F). However,

449 suppression of the innate response by the expression of the N-Pro or V proteins  
450 stimulated GII.3 HuNoV replication in the D196 line; when comparing the yield of  
451 viral RNA from IECs derived from the non-transduced D196 line to those  
452 obtained from the transduced IECs, we observed that GII.3 HuNoV replication  
453 was increased by ~33-fold and ~6-fold in the NPro and V protein expressing  
454 D196-derived IECs respectively (Fig. 5G). Furthermore, we found that HuNoV  
455 GII.3 infection of the transduced lines did not induce ISG15, confirming the  
456 functionality of the transduced innate immune antagonists in HuNoV infected  
457 IECs (not shown). Similar results were obtained using a second transduced  
458 duodenal organoid line (results not shown). These results demonstrate that IECs  
459 produced from IFN-deficient organoids are more permissive for HuNoV and that  
460 the innate response limits HuNoV replication *in vitro*.

461

#### 462 **Selective inhibition of Jak1/Jak2 enhances HuNoV replication in IECs**

463 To further dissect the role of intestinal epithelial innate responses in the  
464 restriction of HuNoV infection, we investigated the effect of a specific Janus-  
465 associated kinase (Jak)1/Jak2 inhibitor on HuNoV replication in human IECs.  
466 Ruxolitinib (Rux), is an FDA approved drug of treatment for patients with  
467 dysregulated Jak signaling associated with myelofibrosis (46, 47) and for graft  
468 versus host disease (GvHD) (48). Rux has also been used to enhance growth of  
469 viruses that are sensitive to IFN (49). We first verified the ability of Rux to inhibit  
470 Type I and Type III IFN signaling following treatment of differentiated IEC  
471 monolayers derived from duodenal organoids with IFN $\beta$  or IFN $\lambda$ 1/2. Rux

472 pretreatment was able to efficiently block the induction of viperin and ISG15  
473 mRNAs following treatment with IFN $\beta$  or IFN $\lambda$ 1/2 (Fig.6A and 6B). We then  
474 examined the effect of Rux on HuNoV replication in IECs derived from the  
475 proximal duodenum and terminal ileum (Fig. 6C-6F). Differentiated IEC  
476 monolayers were inoculated with either a GII.3 or GII.4 HuNoV-positive stool  
477 filtrates. The inoculum was removed after two hours and cells were washed and  
478 maintained in bile acid (GCDCA)-containing media supplemented with either  
479 DMSO, Rux, or 2-C-methylcytidine (2-CMC). 2-CMC was included as a control  
480 as a well characterized inhibitor of HuNoV replication in replicon containing cells  
481 (26).

482

483 The impact of Rux treatment on HuNoV replication was assessed at 2d p.i. by  
484 qRT-PCR and confirmed that the inhibition of Jak stimulated HuNoV replication.  
485 In the absence of Rux, we observed a ~79-fold and ~2965-fold increased in  
486 HuNoV GII.3 and GII.4 viral RNA respectively in IECs derived from duodenal and  
487 terminal ileum organoids respectively (Fig. 6C-F). The inclusion of Rux in cultures  
488 following inoculation resulted in a significant improvement of HuNoV replication in  
489 all cases; GII.3 replication was increased to ~477- and GII.4 replication increased  
490 to ~5641-fold over a 48 hour period (Fig. 6C-F). In all cases, the addition of 2-  
491 CMC inhibited HuNoV replication, producing levels of viral RNA near identical to  
492 those observed at D0 p.i. (Fig. 6C-F). Rux stimulated the replication of a number  
493 of HuNoV isolates in IECs derived from a variety duodenum and terminal ileum  
494 organoid lines (Fig. S1). These results confirm that activation of the Jak1/Jak2

495 inhibits HuNoV replication and that pharmacological inhibition of this pathway  
496 increased HuNoV replication in culture.

497

498 **Inhibition of RNA polymerase II-dependent transcription increases HuNoV**  
499 **replication in IECs**

500

501 To further assess the impact of *de novo* transcriptional responses on the  
502 restriction of HuNoV replication in IECs we examined the impact of Triptolide  
503 (TPL), a compound extracted from a traditional Chinese medicinal plant  
504 (*Tripterygium wilfordii* Hook F), on HuNoV replication in culture. TPL has potent  
505 immunosuppressant and anti-inflammatory activities, exhibiting a broad  
506 pharmacological effects against inflammation, fibrosis, cancer, viral infection,  
507 oxidative stress and osteoporosis (50, 51). TPL is known to have both  
508 antiproliferative and proapoptotic effects on a range of cancers (52, 53) and is  
509 reported to modulate the activity of many genes including those involved in  
510 apoptosis and NF- $\kappa$ B-mediated responses (51, 54). RNA polymerase II has  
511 recently been shown to be selectively targeted by TPL, although the mechanism  
512 by which TPL inhibits RNA polymerase II activity is yet to be fully elucidated (55).  
513 One of the known effects of TPL is the rapid depletion of short lived RNAs  
514 including transcription factors, cell cycle regulators and oncogenes (50, 55).  
515 Recent work has also confirmed that TPL treatment inhibits the innate response  
516 and stimulates vesicular stomatitis virus induced oncolysis (56).



517 To examine if the inhibition of transcription by TPL on the capacity of IECs to  
518 respond to IFN, the levels of viperin and ISG15 were assessed following  
519 treatment of cells with IFN $\beta$  or IFN $\lambda$ . The mRNA levels of viperin was increased  
520 by 100- to 250-fold after treatment of IFN $\beta$ 1 or IFN $\lambda$ 1/2 in DMSO-treated control  
521 IEC monolayers, but these increases were almost completely suppressed by the  
522 inclusion of TPL (Fig. 7A). A similar observation was made for ISG15, in that the  
523 inclusion of TPL potently inhibited the induction by interferon (Fig. 7B). These  
524 data confirm that TPL at concentrations that do not to affect overall cell viability is  
525 effective at suppressing the innate response in IECs.

526 To examine the effect of TPL in HuNoV replication, differentiated monolayers  
527 generated from proximal duodenum and terminal ileum were inoculated with  
528 either GII.3 or GII.4 HuNoV-positive stool filtrates. After 2h, the inoculum was  
529 removed and cells were washed and maintained in GCDCA-containing  
530 differentiation media with either DMSO, TPL, or 2-C-methylcytidine (2-CMC) as a  
531 control. The addition of TPL resulted in enhanced HuNoV replication of GII.3 and  
532 GII.4 HuNoV strains (Fig. 7C-7F). These observations were consistent in IECs  
533 derived from both the duodenum (Fig.7C and 7D) and terminal ileum (Fig. 7E-  
534 7F). As expected, the HuNoV replication in the presence of 2-CMC was potently  
535 inhibited (Fig. 7C-7F). Enhancement of viral replication was also observed in  
536 another duodenum and terminal ileum organoid lines (Fig. S2). These results  
537 further confirm that inhibition of IFN-induced transcription increases HuNoV  
538 infection.

539

540

541 **Discussion**

542 The efficient cultivation of HuNoV has remained a challenge since the initial  
543 identification of the prototype norovirus, Norwalk virus, in 1972 (57). Norovirus  
544 infection of the natural host species is very efficient, typically requiring <20 virus  
545 particles to produce a robust infection whereby  $>10^8$  viral RNA copies are shed  
546 per gram of stool within 24 hours (58, 59). Even in heterologous hosts (e.g. pigs)  
547 the HuNoV infectious dose has been estimated to be  $\sim 2 \times 10^3$  viral RNA copies  
548 (60). Despite this, and despite enormous efforts, the ability to culture HuNoV  
549 efficiently has been a significant bottleneck in the study of HuNoV biology (57).  
550 Therefore, the ability to culture HuNoV has the potential to transform our  
551 understanding of many aspects of the norovirus life cycle, greatly enhance the  
552 capacity to develop therapeutics and allows the characterization of authentic viral  
553 neutralization titres following vaccination, rather than the current surrogate gold  
554 standard (21, 23). The net result of >40 years research has resulted in the  
555 establishment of two culture systems for HuNoV that use patient stool samples  
556 as the inoculum. The first such system relies on the replication of HuNoV within  
557 immortalized B-cells and requires the presence of enteric bacteria or soluble  
558 HGBA-like molecules from their surface (21, 22). Whilst, we have been able to  
559 reproduce the culture of HuNoV in immortalised and primary B-cells to varying  
560 degree of success (data not shown), we note that attempts by other labs have  
561 not universally been successful (21).

562

563 The recently developed HuNoV culture system IECs derived from intestinal  
564 organoids (23) while experimentally challenging, has been used in a number of  
565 subsequent studies to examine the impact of disinfectants (61) and the  
566 monoclonal antibodies (62, 63). This study set out to use organoid-based system  
567 to assess the cellular pathways that restrict HuNoV replication and to further  
568 refine the experimental conditions that allow optimal growth of HuNoV in culture.  
569 We found that HuNoV infection induces a robust innate response in IECs, in  
570 contrast to previous studies using transfection of purified HuNoV viral RNA into  
571 immortalized cells which concluded that the interferon response is unlikely to play  
572 a role (37). While the conclusions drawn in this previous study may be valid, it is  
573 likely that the inefficient replication seen using transfected RNA, where less than  
574 0.1% of transfected cells contain active replicating viral RNA, reduce the  
575 sensitivity of the experimental system. This may be further confounded by  
576 unknown mutations that affect the robustness of the sensing pathways within  
577 immortalized cells. These previous observations, also contrast with our own  
578 findings that suggest that the ability of cells to respond to exogenous interferon  
579 negatively impacts on HuNoV replication (64, 65). This conclusion was based on  
580 the finding that the IFN $\lambda$  receptor is epigenetically suppressed in an immortalized  
581 intestinal cell line which efficiently replicates a HuNoV GI replicon and that  
582 genetic ablation of IFN $\lambda$  receptor expression enhances HuNoV replication in  
583 immortalized cells (65). We also recently described the generation of a robust  
584 culture system in zebrafish larvae, in which we also observed MX and RSAD2  
585 (viperin) induction (39). Furthermore, it is well established that the interferon  
586 response is key to the control of MNV infection as mice lacking a competent

587 innate response often succumb to lethal systemic MNV infections (66–68),  
588 demonstrating that the innate response is key to the restriction of norovirus  
589 infection to intestinal tissues in the mouse model (69). The development of the  
590 HuNoV organoid culture system provides the first opportunity to assess the  
591 impact of HuNoV infection on IECs, the first port of entry into the natural host.

592

593 Here we have seen that HuNoV infection of IECs induces an IFN-like  
594 transcriptional response by examining the replication of single HuNoV GII.4  
595 isolate in IECs derived from two independent terminal ileum organoid lines from  
596 two different donors (Fig. 3). We chose the terminal ileum-derived organoids as  
597 our source of IECs as our data to date would suggest that GII.4 HuNoV replicates  
598 more efficiently in IECs derived from this gut segment whereas the GII.3 isolate  
599 replicated more efficiently in duodenal lines (Fig. 1D). Whether this difference  
600 was organoid line or viral strain specific, or suggests differing tropism is  
601 unknown, however this observation was consistent across several different  
602 duodenal or ileal organoid lines (data not shown).

603

604 Under the conditions used in the current study, the overall number of genes  
605 altered more than 2-fold in response to infection was relatively modest, 70 and  
606 162 for TI365 and TI1006 respectively. We found that the transcriptional  
607 response induced in each organoid line was highly comparable, with a  
608 substantial overlap in the induced genes (Fig. 4). The use of UV inactivated  
609 inoculum allowed us to control for any non-specific effects of the other  
610 components of the filtered stool sample. Given the heterogeneity of any given

611 stool sample, including this was essential to ensuring the observations were  
612 robust and represented alterations due to sensing of active viral replication  
613 intermediates. The rather modest number of genes induced, likely reflects the  
614 heterogenous nature of the IEC cultures and that not all cells in any given  
615 monolayer are permissive to infection. We estimate that ~30% of cells were  
616 infected under the conditions used for the gene expression analysis which is  
617 similar to previous reports (23). The inclusion of Rux or TPL increased the overall  
618 number of infected cells in any given culture to ~50% but even under the  
619 modified conditions, we have been unable to obtain higher levels of infection  
620 (data not shown). We hypothesize that obtaining higher levels of infection will  
621 likely require more uniform cultures, consisting primarily of enterocytes, the target  
622 cell for HuNoV (23).

623

624 The mechanism by which HuNoV is sensed by the infected cells is not currently  
625 known, however data from MNV suggests a clear role for Mda5-mediated  
626 sensing in the restriction of norovirus replication both in cell culture and *in vivo*  
627 (70). The sensing of MNV RNA occurs in a process that requires the HOIL1  
628 component of the linear ubiquitin chain assembly complex (LUBAC) complex  
629 (71). Other components of the RNA sensing pathways have been implicated in  
630 the innate response to MNV including MAVS, IRF3 and IRF7 (70, 71) but the role  
631 they play in sensing of HuNoV RNA is unknown. In addition to targeting STAT1  
632 for degradation (72), the PIV5 V protein is known to also inhibit the activity of  
633 Mda5 (44). Whilst not directly assessed, it is therefore likely that the stimulation is

634 of HuNoV replication in the presence of the PIV5 V protein is a combined result  
635 of both of these activities. Further studies using gene edited organoid lines will be  
636 required to better define the relative contribution of each component in the  
637 sensing of HuNoV.

638

639 The most highly induced gene in response to HuNoV infection in both organoid  
640 lines was IFI44L, a novel tumour suppressor (73) previously show to have  
641 modest antiviral activity against HCV (74) and RSV (75, 76). IFI44L was also  
642 potently upregulated in IECs infected with human rotavirus (HRV) (77).  
643 Surprisingly, despite inducing a potent interferon response in IECs, HRV is not  
644 restricted by the endogenously produced IFN (77), an effect that has been  
645 hypothesized to be due to viral regulatory mechanisms that suppress the  
646 downstream activities of the induced genes. A number of the genes induced in  
647 response to HuNoV infection of IECs have previously been shown to have anti-  
648 viral activity against noroviruses. GBP4 and GBP1 were both induced following  
649 GII.4 infection of both organoid lines (Fig 3). The GBPs are interferon induced  
650 guanylate-binding proteins that are targeted to membranes of vacuoles that  
651 contain intracellular fungi or bacterial pathogens (78, 79), where they frequently  
652 result in the disruption of the pathogen-containing vacuoles (79). GBPs are  
653 targeted to the MNV replication complex in an interferon dependent manner that  
654 requires components of the autophagy pathway and exert their antiviral activity  
655 via an unknown mechanism (80). GBP2 was also identified as a norovirus  
656 restriction factor in a CRISPR based activation screen where it was found to have

657 potent antiviral activity against two strains of MNV (81). Further studies will be  
658 required to determine if GBPs have similar antiviral effects during HuNoV  
659 infection.

660

661 The IFIT proteins IFIT1-3 were also significantly induced in response to HuNoV  
662 Infection of IECs (Fig 3, Table S1). The IFITs are a family of interferon stimulated  
663 RNA binding proteins that, at least in humans, are thought to inhibit the  
664 translation of foreign RNAs by binding to 5' termini and preventing translation  
665 initiation (82, 83). In the context of norovirus infection, we have recently shown  
666 that the translation of norovirus VPg-linked RNA genome is not sensitive to IFIT1-  
667 mediated restriction (84), most likely due to the mechanism by the novel VPg-  
668 dependent manner with which norovirus RNA is translated (84). However, we did  
669 observe that IFIT1 in some way enhanced the IFN-mediated suppression of  
670 norovirus replication through an as yet undefined mechanism (84).

671

672 The development of the B-cell and organoid culture system have opened up the  
673 opportunity to dissect the molecular mechanisms of norovirus genome replication  
674 and to better understand host responses to infection. Others have observed that  
675 HuNoV replication in organoid derived IECs is highly variable (85) which agrees  
676 with our own experience during the course of the current study as we observed  
677 significant levels of week to week variation in infectious yield from the same  
678 organoid lines for any single strain of HuNoV (data not shown). We have also  
679 observed, as have others, that not all HuNoV strains appear to replicate  
680 efficiently in IECs derived from any single organoid line, which likely reflects the

681 natural biology of HuNoV as individual susceptibility varies within any given  
682 population (85). What factors contribute to the relative permissiveness of any  
683 given organoid line to an isolate of HuNoV remains to be determined, but it is  
684 clear that Fut2 function appears essential for most HuNoV isolates as FUT2  
685 negative lines were not permissive to the strains of viruses tested here (85, 86),  
686 data not shown). It is also possible that strains vary in the degree to which they  
687 induce and are sensitive to, the interferon response, as is common for other  
688 positive sense RNA viruses. Our data would suggest that irrespective of this, the  
689 replication of all isolates examined appear to be improved by treatment of  
690 cultures with Rux or TPL (Figs. 6 and 7; Figs. S2 and S3; and data not shown).

691

692 To our knowledge, our study represents the first demonstration that the genetic  
693 modification of human intestinal organoids can improve viral replication. The  
694 expression of BVDV NPro and PIV5 V proteins in cells has been widely used as  
695 a way to enhance virus replication in immortalised cells via the inactivation of  
696 aspects of the innate response (18, 87, 88). While the genetically modified  
697 organoids enhanced HuNoV replication by up to 30-fold in comparison to  
698 unmodified organoids we found that this varied between organoid lines examined  
699 (not shown). Surprisingly, we found that the process of differentiation, resulted in  
700 a significant increase in the basal levels of a number of ISGs (data not shown).  
701 Therefore the reason for variation in the enhancement is unknown but it may  
702 relate to the ability of any given organoid line to respond effectively and produce  
703 a rapid and effective innate response. The ability to readily generate gene edited



704 human intestinal organoids while possible, is still very much in its infancy (89),  
705 therefore the ability to overexpress viral innate immune antagonists provides a  
706 more rapid way of generating intestinal organoids with specific defects in innate  
707 immune pathways. However, the simple inclusion of TPL or Rux appears to  
708 phenocopy the effect of overexpression of either NPro or V protein and can be  
709 readily applied to any organoid line. This low cost modification to culture  
710 conditions enhances the utility of the experimental system by improving the  
711 robustness of the replication.

712

713 The use of pharmacological inhibitors for the stimulation of viral infection has  
714 been described in many instances in immortalised cell lines (49, 56, 90), and  
715 more recently for viral infection of intestinal organoids (91). The mechanism of  
716 action of Rux is well defined as it specifically targets the JAK kinases (46). In  
717 contrast, the mechanism of action of TPL is less well defined but recent data  
718 suggests a direct mode of action on RNA polymerase II-mediated transcription  
719 (55). TPL has previously been shown to stimulate the replication of VSV by the  
720 inhibition of the interferon induced transcriptional responses (56). While TPL is  
721 not clinically used due to problems with water solubility, a water soluble pro-drug  
722 minnelide, has been trialled as an anti-cancer treatment for a number of cancers  
723 including pancreatic cancer (92).

724

725 Norovirus infection has now been widely accepted as a significant cause of  
726 morbidity and mortality in immunocompromised patients (13). In such cases,  
727 patients on immunosuppressive therapy following organ or stem cell replacement  
728 therapies, or those undergoing treatment for cancer, often suffer from infection  
729 lasting months to years (13, 93). Such infections have significant impact on the  
730 overall health of the affected patient, resulting in significant weight loss and a  
731 requirement for enhanced nutritional support (94). Ruxolitinib, under the trade  
732 name Jakavi, is approved for the treatment of a range of diseases including  
733 splenomegaly in patients with myelofibrosis and has been shown to be effective  
734 in the treatment of chronic or acute (48, 95). Our data could suggest that the  
735 sustained administration of Rux in patients where chronic norovirus has been  
736 detected, may exacerbate the disease. We note however that during a study  
737 examining the effect of Rux on NK cell function in patients with STAT1 gain of  
738 function mutations, a single patient with chronic norovirus infection appeared to  
739 clear the infection following Rux treatment (96). The impact of Rux treatment on  
740 viral loads, and whether clearance was spontaneous, or due to improved NK cell  
741 function was not reported.

742

743 In summary, we have demonstrated HuNoV replication in IECs is restricted by  
744 the interferon response and that modulation of this response through either the  
745 genetic manipulation of intestinal organoids or the inclusion of pharmacological  
746 inhibitors, enhances HuNoV replication. Overall this work provides new insights  
747 into the cellular pathways and processes that control the replication of HuNoV,

748 and provides improved conditions for the culture of HuNoV, enhancing the  
749 robustness of the HuNoV organoid culture system.

750

751

## 752 **Acknowledgments**

753 This work was funded by research grants to IG: Wellcome Trust Ref:  
754 207498/Z/17/Z IG is a Wellcome trust Senior Fellow. F.S. was funded by a  
755 Biotechnology and Biological Sciences Research Council (BBSRC) sLoLa grant  
756 (BB/K002465/1).

757 We thank Professor Steve Goodbourn (St. Georges Hospital, London) for the  
758 provision of the BVDV NPro and PIV5 V protein expression plasmids.

759

760

## 761 **Figure Legends:**

### 762 **Figure 1: Overview of the human norovirus culture system.**

763 A) Schematic of the intestinal crypt isolation procedure leading to the production  
764 of intestinal organoids. Following isolation by biopsy, crypts were plated into  
765 Matrigel as described in the text and imaged by light microscopy. B, C)  
766 differentiation of intestinal organoids from the duodenum and terminal ileum into

767 intestinal epithelial cells (IEC) monolayers is accompanied by loss of the stem  
768 cell marker LGR5 and increased intestinal alkaline phosphatase (AP) expression.  
769 Intestinal organoid lines were plated onto collagen coated plates as described in  
770 the text and the relative levels of LGR5 or ALP quantified by RT-qPCR.  
771 Expression levels are shown relative to the undifferentiated cells extracted on  
772 day 0 of plating. D) Infection of differentiated IECs from the duodenum (D196)  
773 and terminal ileum (TI365) with two clinical isolates of human norovirus (GII.3  
774 and GII.4). Infection was assessed by the quantification of absolute viral RNA  
775 levels by RT-qPCR and is shown as both absolute values (D) and fold the  
776 increase in viral RNA levels when comparing day 0 to day 2 (D2).

777

778 **Figure 2: Human norovirus infection of intestinal epithelial cells induces**  
779 **interferon stimulated genes and is sensitive to Type I and III interferon.**

780 A, B) The levels of two interferon stimulated genes, viperin and ISG15, following  
781 norovirus infection of differentiated intestinal epithelial cells from the terminal  
782 ileum (TI365) was assessed at 24 and 48 hours post infection. Monolayers either  
783 GII.4 human norovirus or UV-inactivated GII.4. Relative gene expression was  
784 assessed by RT-qPCR and is shown as Log2 fold induction in comparison to the  
785 mock infected control. C) GII.4 Human norovirus infection of terminal ileum is  
786 sensitive to Type I (IFN $\beta$ ) and Type III (IFN $\lambda$ ). Differentiated IEC monolayers  
787 were either mock treated or treated with recombinant IFN for 18 hours prior to  
788 infection with GII.4 HuNoV. Viral RNA levels at two days post infection were then  
789 quantified by RT-PCR and the increased in viral RNA expressed as a percentage  
790 of the untreated control.

791

792 **Figure 3. Norovirus infection of intestinal epithelial cells results in an**  
793 **interferon-induced transcriptomic response.**

794 A, B) IECs derived from two terminal ileum organoid lines (TI365 and TI006)  
795 were infected with a GII.4 HuNoV containing stool filtrate (Virus), the same stool  
796 filtrate that was UV-inactivated or mock infected and the levels of viral RNA  
797 quantified 48 hours post infection by RT-qPCR. Infections were performed in  
798 biological triplicate and quantified by RT-qPCR in technical duplicate. Error bars  
799 represent SEM. C-F) Volcano plots of differentially expressed genes from RNA-  
800 Seq analysis comparing gene expression in two different HuNoV infected  
801 organoids compared to mock (C, D) or UV-treated HuNoV infection (E, F).  
802 Significantly up- or down-regulated genes (FDR<0.01 and log<sub>2</sub> fold change ≥ 1)  
803 are represented in red or blue, respectively. G-H) Comparison of expression  
804 changes of selected genes following HuNoV infection measured by RNA-Seq  
805 and RT-qPCR. Error bars represent the SD of one experiment performed in  
806 biological triplicate. The Pearson correlation coefficient (r), associated p-value (p)  
807 and the number of pairs analysed (n) are indicated on each chart.

808

809 **Figure 4. Human intestinal epithelial cells mount an interferon response to**  
810 **GII.4 human norovirus infection.**

811 A) Transcription factor enrichment analysis from differentially expressed genes of  
812 IECs from two terminal ileum-derived organoid lines (TI365 and TI006). Enriched  
813 transcription factors, number of occurrence among significantly regulated genes  
814 and significance are indicated for each organoid infection. B) Heat map showing  
815 the expression changes of the top 20 genes across two independent IEC  
816 infections. Genes are arranged by decreasing average enrichment fulfilling a  
817 false discovery rate (FDR) lower than 0.01. C) Heat map showing the most  
818 significant enriched Gene Ontology categories for biological processes inferred  
819 from significantly regulated genes across two independent organoid infections.

820

821 **Figure. 5 Genetically modified IFN-deficient organoids are more permissive**  
822 **for HuNoV replication.**

823 Duodenal intestinal organoids were modified by lentivirus-mediated transduction  
824 of the viral innate immune regulators, BVDV NPro and PIV5 V proteins. A) Two  
825 independent clones of transduced organoids were lysed and the expression of  
826 STAT1, IRF3 and GAPDH were examined by western blot to confirm the  
827 functionality of the BVDV NPro or V protein in intestinal organoids. B-E) To verify  
828 the inhibition of IFN production or IFN signaling, unmodified or modified intestinal  
829 epithelial cells were differentiated into monolayers and were transfected with poly  
830 I:C or treated with recombinant universal Type I interferon (IFN $\alpha$ /D). The levels  
831 of IFN $\beta$ , IFN $\lambda$ 1/2, viperin and ISG15 were then quantitated by RT-qPCR. F, G)  
832 Replication of HuNoV GII.3 was examined in IECs derived from IFN-deficient  
833 organoids (D196). The levels of viral RNA obtained 48h post infection (D2) where

834 compared to those obtained 2h post infection (D0). The levels of viral RNA  
835 replication seen in modified organoids were expressed relative to that seen in the  
836 control unmodified organoid line. All experiments were performed at least two  
837 independent times and results are expressed as mean  $\pm$ SEM from duplicate  
838 samples analyzed in technical duplicate. Statistically significant values are  
839 represented as: \* $p \leq 0.05$ , \*\* $p \leq 0.01$ , \*\*\* $p \leq 0.001$  and \*\*\*\* $p \leq 0.0001$ .

840

841 **Fig. 6 Inhibition of Jak1/Jak2 by Ruxolitinib (RUX) enhances HuNoV**  
842 **replication in intestinal epithelial cells.**

843 A,B) The ability of ruxolitinib (Rux) to inhibit type I and type III IFN signaling was  
844 examined following interferon (IFN $\beta$  or IFN $\lambda$ 1/2) pretreatments of intestinal  
845 epithelial cells derived from duodenal intestinal organoids (D196). C-F) To  
846 investigate the impact the role of JAK signaling in the restriction of HuNoV  
847 replication, intestinal epithelial cells were treated with DMSO, ruxolitinib (RUX) or  
848 2-CMC (an inhibitor of HuNoV RNA-dependent RNA polymerase), and the impact  
849 of viral RNA synthesis was examined at 48h post inoculation (D2) by RT-qPCR.  
850 All experiments were performed at least three independent times and results are  
851 expressed as mean  $\pm$ SEM from triplicate samples analysed in technical  
852 duplicate. Significant values are represented as:\* $p \leq 0.05$ , \*\* $p \leq 0.01$ , \*\*\* $p \leq$   
853  $0.001$  and \*\*\*\* $p \leq 0.0001$

854

855 **Fig. 7 Inhibition of cellular transcription by triptolide (TPL), an RNAPII**  
856 **inhibitor, enhances HuNoV replication in intestinal epithelial cells.** A,B) The  
857 ability of triptolide to inhibit type I and type III IFN signaling was examined

858 following interferon pretreatment of intestinal epithelial cells derived from  
859 duodenal intestinal organoids (D421). C-F) To investigate the impact of restriction  
860 of transcription factors in HuNoV GII.3 and GII.4 replication, intestinal epithelial  
861 cells derived from duodenum (D421) and ileum (TI365) were treated with DMSO,  
862 triptolide (TPL) or 2-CMC (an inhibitor of HuNoV polymerase), and the impact of  
863 viral RNA synthesis was examined at 48h post inoculation (D2) by RT-qPCR. All  
864 experiments were performed at least three independent times and results are  
865 expressed as mean  $\pm$  SEM from triplicate samples analysed in technical  
866 duplicate. Significant values are represented as: \* $p \leq 0.05$ , \*\* $p \leq 0.01$ , \*\*\* $p \leq$   
867 0.001 and \*\*\*\* $p \leq 0.0001$

868

#### 869 **Supplementary figure legends.**

870

#### 871 **Figure S1: Ruxolitinib stimulates the replication of GII.4 in intestinal** 872 **epithelial cells from a mucosa derived intestinal epithelial organoids (IEOs).**

873 Intestinal organoids were generated from biopsies derived from the duodenum of  
874 four patients (Lines designated D353, D419, D421 and D428) or the terminal  
875 ileum of a single patient (TI006). Intestinal epithelial cell monolayers (IEC) were  
876 generated as described in the text and infected with either GII.3 or GII.4 human  
877 norovirus stool filtrate. The level of viral RNA levels were quantified at day 0 (D0)  
878 or 48 hours post infection (D2) by RT-qPCR and plotted as either genome  
879 equivalents per well (left hand column) or fold increase in viral RNA over 48  
880 hours (right hand column). The impact of the inclusion of the Jak inhibitor (RUX)  
881 or the RNA polymerase inhibitor (2-CMC) on viral replication was examined by



882 the addition of RUX or 2-CMC following the inoculation phase of the infection. All  
883 experiments were performed at least three independent times and results are  
884 expressed as mean  $\pm$  SEM from triplicate samples analysed in technical  
885 duplicate. Significant values are represented as: \* $p \leq 0.05$ , \*\* $p \leq 0.01$ , \*\*\* $p \leq$   
886 0.001 and \*\*\*\* $p \leq 0.0001$ .

887

888 **Figure S2: Triptolide stimulates the replication of GII.3 or GII.4 in intestinal**  
889 **epithelial cells from a mucosa derived intestinal epithelial organoids (IEOs).**

890 Intestinal organoids were generated from biopsies derived from the duodenum  
891 (Line D428) or the terminal ileum of a single patient (TI006). Intestinal epithelial  
892 cell monolayers (IEC) were generated as described in the text and infected with a  
893 GII.4 human norovirus stool filtrate. The level of viral RNA levels were quantified  
894 at day 0 (D0) or 48 hours post infection (D2) by RT-qPCR and plotted as either  
895 genome equivalents per well (left hand column) or fold increase in viral RNA over  
896 48 hours (right hand column). The impact of the inclusion of the RNA  
897 polymerase II inhibitor (TPL) or the viral RNA polymerase inhibitor (2-CMC) on  
898 viral replication was examined by the addition of TPL or 2-CMC following the  
899 inoculation phase of the infection. All experiments were performed at least three  
900 independent times and results are expressed as mean  $\pm$  SEM from triplicate  
901 samples analysed in technical duplicate. Significant values are represented as: \* $p$   
902  $\leq 0.05$ , \*\* $p \leq 0.01$ , \*\*\* $p \leq 0.001$  and \*\*\*\* $p \leq 0.0001$ .

903 **Supplementary Table 1. Supplier information of the composition of the**  
904 **organoid growth and differentiation media used for the culture of mucosal**  
905 **derived intestinal organoids in this study.**

906

907 **Supplementary Table 2. Supplier details of the interferons and inhibitors**  
908 **used in this study.**

909

910

911 **Supplementary Table 3. Summary of the differential gene expression**  
912 **analysis of GII.4 infected intestinal epithelial cells.** RNA seq analysis was  
913 performed as described in the text. The data shown is the average of the data  
914 obtained from the two biological repeats. Differential gene expression analysis  
915 was performed by comparing the data obtained for infected vs mock infected  
916 IECs (Tabs A & C) or infected vs IECs infected with UV-inactivated inoculum.

917

918 **References:**

- 919 1. Takeuchi O, Akira S. 2009. Innate immunity to virus infection. *Immunol Rev*  
920 227:75–86.
- 921 2. Randall RE, Goodbourn S. 2008. Interferons and viruses: An interplay  
922 between induction, signalling, antiviral responses and virus  
923 countermeasures. *J Gen Virol* 89:1–47.
- 924 3. Thorne LG, Goodfellow IG. 2014. Norovirus gene expression and  
925 replication. *J Gen Virol* 95:278–91.
- 926 4. Karst SM. 2010. Pathogenesis of noroviruses, emerging RNA viruses.  
927 *Viruses* 2:748–81.
- 928 5. Karst SM, Zhu S, Goodfellow IG. 2015. The molecular pathology of  
929 noroviruses. *J Pathol* 235:206–216.

- 930 6. Parra GI, Squires RB, Karangwa CK, Johnson JA, Lepore CJ, Sosnovtsev  
931 S V., Green KY. 2017. Static and Evolving Norovirus Genotypes:  
932 Implications for Epidemiology and Immunity. *PLoS Pathog* 13:1–22.
- 933 7. Bailey D, London IC, Place N. 2009. Noroviruses. *Encycl Life Sci* DOI:  
934 10.1002/9780470015902.a0000420.
- 935 8. Robilotti E, Deresinski S, Pinsky BA. 2015. Norovirus. *Clin Microbiol Rev*  
936 28:134–164.
- 937 9. Kocher J, Yuan L. 2015. Norovirus vaccines and potential antinorovirus  
938 drugs: Recent advances and future perspectives. *Future Virol* 10:899–913.
- 939 10. Motoya T, Nagasawa K, Matsushima Y, Nagata N, Ryo A, Sekizuka T,  
940 Yamashita A, Kuroda M, Morita Y, Suzuki Y, Sasaki N, Katayama K,  
941 Kimura H. 2017. Molecular evolution of the VP1 gene in human norovirus  
942 GII.4 variants in 1974-2015. *Front Microbiol* 8:1–17.
- 943 11. Bartsch SM, Lopman BA, Ozawa S, Hall AJ, Lee BY. 2016. Global  
944 economic burden of norovirus gastroenteritis. *PLoS One* 11:1–16.
- 945 12. Host CI. 2017. Human Norovirus Evolution in a Chronically Infected Host.  
946 *mSphere* 2:e00352-16.
- 947 13. Bok K, Green KY. 2013. Norovirus Gastroenteritis in Immunocompromised  
948 Patients. *N Engl J Med* 368:971–983.
- 949 14. Wobus CE, Thackray LB, Virgin HW. 2006. Murine norovirus: a model  
950 system to study norovirus biology and pathogenesis. *J Virol* 80:5104–12.
- 951 15. Vashist S, Bailey D, Putics a, Goodfellow I. 2009. Model systems for the  
952 study of human norovirus Biology. *Future Virol* 4:353–367.
- 953 16. Chang KO, Sosnovtsev SS, Belliot G, Wang QH, Saif LJ, Green KY. 2005.

- 954 Reverse genetics system for porcine enteric calicivirus, a prototype  
955 Sapovirus in the Caliciviridae. *J Virol* 79:1409–1416.
- 956 17. Oka T, Takagi H, Tohyad Y. 2014. Development of a novel single step  
957 reverse genetics system for feline calicivirus. *J Virol Methods* 207:178–181.
- 958 18. Hosmillo M, Sorgeloos F, Hiraide R, Lu J, Goodfellow I, Cho KO. 2015.  
959 Porcine sapovirus replication is restricted by the type I interferon response  
960 in cell culture. *J Gen Virol* 96:74–84.
- 961 19. Yunus MA, Chung LMW, Chaudhry Y, Bailey D, Goodfellow I. 2010.  
962 Development of an optimized RNA-based murine norovirus reverse  
963 genetics system. *J Virol Methods* 169:112–118.
- 964 20. Chaudhry Y, Skinner MA, Goodfellow IG. 2007. Recovery of genetically  
965 defined murine norovirus in tissue culture by using a fowlpox virus  
966 expressing T7 RNA polymerase. *J Gen Virol* 88:2091–2100.
- 967 21. Jones M, Grau K, Costantini V, Kolawole A, de Graaf M, Freiden P, Graves  
968 C, Koopmans M, Wallet S, Tibbetts S, Schultz-Cherry S, Wobus C, Vinjé J,  
969 Karst SM. 2015. Human norovirus culture in B cells. *Nat Protoc* 10:1939–  
970 1947.
- 971 22. Jones MK, Watanabe M, Zhu S, Graves CL, Keyes LR, Grau KR,  
972 Gonzalez-Hernandez MB, Iovine NM, Wobus CE, Vinje J, Tibbetts SA,  
973 Wallet SM, Karst SM. 2014. Enteric bacteria promote human and mouse  
974 norovirus infection of B cells. *Science* (80- ) 346:755–759.
- 975 23. Ettayebi K, Crawford SE, Murakami K, Broughman JR, Karandikar U,  
976 Tenge VR, Neill FH, Blutt SE, Zeng X, Qu L, Kou B, Antone R, Burrin D,  
977 Graham DY, Ramani S, Atmar RL, Mary K. 2016. Replication of human

- 978 noroviruses in stem cell – derived human enteroids. *Science* (80- ) 5211:1–  
979 12.
- 980 24. Kraiczy J, Ross ADB, Forbester JL, Dougan G, Vallier L, Zilbauer M. 2018.  
981 Genome-Wide Epigenetic&nbsp;and Transcriptomic Characterization of  
982 Human-Induced Pluripotent Stem Cell-Derived Intestinal Epithelial  
983 Organoids. *Cell Mol Gastroenterol Hepatol* 7:285–288.
- 984 25. Spence JR, Mayhew CN, Rankin SA, Kuhar MF, Vallance JE, Tolle K,  
985 Hoskins EE, Kalinichenko V V., Wells SI, Zorn AM, Shroyer NF, Wells JM.  
986 2011. Directed differentiation of human pluripotent stem cells into intestinal  
987 tissue in vitro. *Nature* 470:105–110.
- 988 26. Rocha-pereira J, Jochmans D, Debing Y, Verbeken E, Nascimento MSJ.  
989 2013. The Viral Polymerase Inhibitor 2 = - C -Methylcytidine Inhibits  
990 Norwalk Virus Replication and Protects against Norovirus-Induced Diarrhea  
991 and Mortality in a Mouse Model. *J Virol* 87:11798–11805.
- 992 27. Jones MK, Watanabe M, Zhu S, Graves CL, Keyes LR, Grau KR,  
993 Gonzalez-Hernandez MB, M LN, Wobus CE, Vinjé J, Tibbetts SA, Wallet  
994 SM, Karst SM. 2014. Enteric bacteria promote human and mouse norovirus  
995 infection of B cells. *Science* (80- ) 346:755–759.
- 996 28. Bray NL, Pimentel H, Melsted P, Pachter L. 2016. near-optimal probabilistic  
997 rna-seq quantification. *Nat Biot* 34:525–27.
- 998 29. Robinson MD, Mccarthy DJ, Smyth GK. 2010. edgeR : a Bioconductor  
999 package for differential expression analysis of digital gene expression data.  
1000 *Bioinformatics* 26:139–140.
- 1001 30. Law CW, Chen Y, Shi W, Smyth GK. 2014. voom : precision weights

- 1002 unlock linear model analysis tools for RNA-seq read counts. *Genome Biol*  
1003 15:1–17.
- 1004 31. Ritchie ME, Phipson B, Wu D, Hu Y, Law CW, Shi W, Smyth GK. 2015.  
1005 limma powers differential expression analyses for RNA-sequencing and  
1006 microarray studies. *Nucleic Acids Res* 43:1–13.
- 1007 32. BENJAMINI Y, HOCHBERG Y. 1995. Controlling the False Discovery  
1008 Rate : A Practical and Powerful Approach to Multiple Testing Author ( s ):  
1009 Yoav Benjamini and Yosef Hochberg Source : Journal of the Royal  
1010 Statistical Society . Series B ( Methodological ), Vol . 57 , No . 1 Published  
1011 by : J R Stat Soc B 57:289–300.
- 1012 33. Yu G, Wang L-G, Han Y, He Q-Y. 2012. clusterProfiler: an R Package for  
1013 Comparing Biological Themes Among Gene Clusters. *Omi A J Integr Biol*  
1014 16:284–287.
- 1015 34. Huang P, Farkas T, Marionneau S, Zhong W, Ruvoën-Clouet N, Morrow  
1016 AL, Altaye M, Pickering LK, Newburg DS, LePendou J, Jiang X. 2003.  
1017 Noroviruses Bind to Human ABO, Lewis, and Secretor Histo–Blood Group  
1018 Antigens: Identification of 4 Distinct Strain-Specific Patterns. *J Infect Dis*  
1019 188:19–31.
- 1020 35. Currier RL, Payne DC, Staat MA, Selvarangan R, Shirley SH, Halasa N,  
1021 Boom JA, Englund JA, Szilagyi PG, Harrison CJ, Klein EJ, Weinberg GA,  
1022 Wikswo ME, Parashar U, Vinjé J, Morrow AL. 2015. Innate susceptibility to  
1023 norovirus infections influenced by FUT2 genotype in a United States  
1024 pediatric population. *Clin Infect Dis* 60:1631–1638.

- 1025 36. Thorne L, Nalwoga A, Mentzer AJ, De Rougemont A, Hosmillo M, Webb E,  
1026 Nampijja M, Muhwezi A, Carstensen T, Gurdasani D, Hill A V., Sandhu MS,  
1027 Elliott A, Goodfellow I. 2018. The first norovirus longitudinal  
1028 seroepidemiological study from sub-Saharan Africa reveals high  
1029 seroprevalence of diverse genotypes associated with host susceptibility  
1030 factors. *J Infect Dis* 218:716–725.
- 1031 37. Qu L, Murakami K, Broughman JR, Lay MK, Guix S, Tenge VR, Atmar RL,  
1032 Estes MK. 2016. Replication of Human Norovirus RNA in Mammalian Cells  
1033 Reveals Lack of Interferon Response 90:8906–8923.
- 1034 38. Cutler AJ, Oliveira J, Ferreira RC, Challis B, Walker NM, Caddy S, Lu J,  
1035 Stevens HE, Smyth DJ, Pekalski ML, Kennet J, Hunter KMD, Goodfellow I,  
1036 Wicker LS, Todd JA, Waldron-Lynch F. 2017. Capturing the systemic  
1037 immune signature of a norovirus infection: an n-of-1 case study within a  
1038 clinical trial. *Wellcome Open Res* 2:28.
- 1039 39. Van Dycke J, Ny A, Conceição-Neto N, Maes J, Hosmillo M, Goodfellow I,  
1040 Nogueira TC, Verbeken E, Matthijnsens J, De P, Neyts J, Rocha-Pereira  
1041 J. 2019. A robust human norovirus replication model in zebrafish larvae  
1042 *Clinical and Epidemiological Virology*. [bioRxiv doi.org/10.1101/528364](https://doi.org/10.1101/528364).
- 1043 40. Hilton L, Moganeradj K, Zhang G, Chen Y-H, Randall RE, McCauley JW,  
1044 Goodbourn S. 2006. The NPro product of bovine viral diarrhoea virus inhibits  
1045 DNA binding by interferon regulatory factor 3 and targets it for proteasomal  
1046 degradation. *J Virol* 80:11723–32.
- 1047 41. Peterhans E, Schweizer M. 2013. BVDV: a pestivirus inducing tolerance of  
1048 the innate immune response. *Biologicals* 41:39–51.

- 1049 42. Andrus L, Marukian S, Jones CT, Catanese MT, Sheahan TP, Schoggins  
1050 JW, Barry WT, Dustin LB, Trehan K, Ploss A, Bhatia SN, Rice CM. 2011.  
1051 Expression of paramyxovirus V proteins promotes replication and spread of  
1052 hepatitis C virus in cultures of primary human fetal liver cells. *Hepatology*  
1053 54:1901–12.
- 1054 43. Childs K, Randall R, Goodbourn S. 2012. Paramyxovirus V Proteins  
1055 Interact with the RNA Helicase LGP2 To Inhibit RIG-I-Dependent Interferon  
1056 Induction. *J Virol* 86:3411–3421.
- 1057 44. Childs K, Stock N, Ross C, Andrejeva J, Hilton L, Skinner M, Randall R,  
1058 Goodbourn S. 2007. mda-5, but not RIG-I, is a common target for  
1059 paramyxovirus V proteins. *Virology* 359:190–200.
- 1060 45. Randall R, Goodbourn S, Childs K. 2012. Paramyxovirus V Proteins  
1061 Interact with the RNA Helicase LGP2 To Inhibit RIG-I-Dependent Interferon  
1062 Induction. *J Virol* 86:3411–3421.
- 1063 46. Harrison C, Vannucchi AM. 2012. Ruxolitinib: A potent and selective Janus  
1064 kinase 1 and 2 inhibitor in patients with myelofibrosis. An update for  
1065 clinicians. *Ther Adv Hematol* 3:341–354.
- 1066 47. Furumoto Y, Gadina M. 2013. The arrival of jak inhibitors: Advancing the  
1067 treatment of immune and hematologic disorders. *BioDrugs* 27:431–438.
- 1068 48. Neumann T, Schneidewind L, Weigel M, Plis A, Vaizian R, Schmidt CA,  
1069 Krüger W. 2019. Ruxolitinib for Therapy of Graft-versus-Host Disease.  
1070 *Biomed Res Int* 2019:doi.org/10.1155/2019/8163780.
- 1071 49. Stewart CE, Randall RE, Adamson CS. 2014. Inhibitors of the Interferon  
1072 Response Enhance Virus Replication In Vitro. *PLoS One* 9:3–10.



- 1073 50. Chen S, Dai Y, Zhao J, Lin L, Wang Y, Wang Y. 2018. A Mechanistic  
1074 Overview of Triptolide and Celastrol, Natural Products from *Tripterygium*  
1075 *wilfordii* Hook F. *Front Pharmacol* 9:doi: 10.3389/fphar.2018.00104.
- 1076 51. Qiu D, Zhao G, Aoki Y, Shi L, Uyei A, Nazarian S, Ng JC, Kao PN. 1999.  
1077 Immunosuppressant PG490 (Triptolide) Inhibits T-cell Interleukin-2  
1078 Expression at the Level of Purine-box / Nuclear Factor of Activated T-cells  
1079 and NF- $\kappa$ B Transcriptional Activation. *J Biol Chem* 274:13443–13450.
- 1080 52. Kim JH, Park B. 2017. Triptolide blocks the STAT3 signaling pathway  
1081 through induction of protein tyrosine phosphatase SHP-1 in multiple  
1082 myeloma cells. *Int J Mol Med* 40:1566–1572.
- 1083 53. Carter BZ, Mak DH, Schober WD, McQueen T, Harris D, Estrov Z, Evans  
1084 RL, Andreeff M. 2006. Triptolide induces caspase-dependent cell death  
1085 mediated via the mitochondrial pathway in leukemic cells. *Blood* 108:630–  
1086 637.
- 1087 54. Jang B, Lim K, Choi I, Suh M, Park J, Mun K, Bae J, Shin D, Suh S. 2007.  
1088 Triptolide suppresses interleukin-1 $\beta$ -induced human  $\beta$ -defensin-2 mRNA  
1089 expression through inhibition of transcriptional activation of NF- $\kappa$  B in A549  
1090 cells. *Int J Mol Med* 757–763.
- 1091 55. Vispé S, Devries L, Créancier L, Besse J, Bréand S, Hobson DJ, Svejstrup  
1092 JQ, Annereau J, Cussac D, Dumontet C, Guilbaud N, Barret J, Bailly C.  
1093 2009. Triptolide is an inhibitor of RNA polymerase I and II – dependent  
1094 transcription leading predominantly to down-regulation of short-lived  
1095 mRNA. *Mol Cancer Ther* 8:2780–2791.
- 1096 56. Ben Yebdri F, Van Grevenynghe J, Tang VA, Goulet ML, Wu JH, Stojdl DF,

- 1097 Hiscott J, Lin R. 2013. Triptolide-mediated inhibition of interferon signaling  
1098 enhances vesicular stomatitis virus-based oncolysis. *Mol Ther* 21:2043–  
1099 2053.
- 1100 57. Duizer E, Schwab KJ, Neill FH, Atmar RL, Koopmans MPG, Estes MK.  
1101 2004. Laboratory efforts to cultivate noroviruses. *J Gen Virol* 85:79–87.
- 1102 58. Tu ETV, Bull RA, Kim MJ, Mclver CJ, Heron L, Rawlinson WD, White PA.  
1103 2008. Norovirus excretion in an aged-care setting. *J Clin Microbiol*  
1104 46:2119–2121.
- 1105 59. Lee N, Chan MCW, Wong B, Choi KW, Sin W, Lui G, Chan PKS, Lai RWM,  
1106 Cockram CS, Sung JJY, Leung WK. 2007. Fecal viral concentration and  
1107 diarrhea in norovirus gastroenteritis. *Emerg Infect Dis* 13:1399–1401.
- 1108 60. Bui T, Kocher J, Li Y, Wen K, Li G, Liu F, Yang X, Leroith T, Tan M, Xia M,  
1109 Zhong W, Jiang X, Yuan L. 2013. Median infectious dose of human  
1110 norovirus GII.4 in gnotobiotic pigs is decreased by simvastatin treatment  
1111 and increased by age. *J Gen Virol* 94:2005–2016.
- 1112 61. Costantini V, Vinjé J, Morantz EK, Browne H, Ettayebi K, Zeng X-L, Atmar  
1113 RL, Estes MK. 2018. Human norovirus replication in human intestinal  
1114 enteroids as model to evaluate virus inactivation. *Emerg Infect Dis*  
1115 24:1453–1464.
- 1116 62. Alvarado G, Ettayebi K, Atmar RL, Bombardi RG, Kose N, Estes MK,  
1117 Crowe JE. 2018. Human Monoclonal Antibodies That Neutralize Pandemic  
1118 GII.4 Noroviruses. *Gastroenterology* 155:1898–1907.
- 1119 63. Koromyslova A, Morozov V, Hefele L, Hansman GS. 2019. Human  
1120 Norovirus Neutralized by a Monoclonal Antibody Targeting the Histo-Blood

- 1121 Group Antigen Pocket. J Virol DOI: 10.1128/JVI.02174-18.
- 1122 64. Chang K-O, George DW. 2007. Interferons and Ribavirin Effectively Inhibit  
1123 Norwalk Virus Replication in Replicon-Bearing Cells. J Virol 81:12111–  
1124 12118.
- 1125 65. Arthur SE, Sorgeloos F, Hosmillo M, Goodfellow I. 2019. Epigenetic  
1126 suppression of interferon lambda receptor expression leads to enhanced  
1127 HuNoV replication in vitro. bioRxiv doi.org/10.1101/523282.
- 1128 66. Mumphrey SM, Changothra H, Moore TN, Heimann-Nichols ER, Wobus CE,  
1129 Reilly MJ, Moghadamfalahi M, Shukla D, Karst SM. 2007. Murine norovirus  
1130 1 infection is associated with histopathological changes in  
1131 immunocompetent hosts, but clinical disease is prevented by STAT1-  
1132 dependent interferon responses. J Virol 81:3251–63.
- 1133 67. Ward JM, Wobus CE, Thackray LB, Erexson CR, Faucette LJ, Belliot G,  
1134 Barron EL, Sosnovtsev S V, Green KY. 2006. Pathology of  
1135 immunodeficient mice with naturally occurring murine norovirus infection.  
1136 Toxicol Pathol 34:708–15.
- 1137 68. Karst SM, Wobus CE, Lay M, Davidson J, Virgin HW. 2003. STAT1-  
1138 dependent innate immunity to a Norwalk-like virus. Science 299:1575–  
1139 1578.
- 1140 69. Karst SM. 2011. The Role of Type I Interferon in Regulating Norovirus  
1141 Infections. J Clin Cell Immunol 1:doi.org/10.4172/2155-9899.S1-001.
- 1142 70. McCartney SA, Thackray LB, Gitlin L, Gilfillan S, Iv HWV, Dc BM. 2008.  
1143 MDA-5 Recognition of a Murine Norovirus 4:1–7.
- 1144 71. MacDuff DA, Baldrige MT, Qaqish AM, Nice TJ, Darbandi AD, Hartley VL,

- 1145 Peterson ST, Miner JJ, Iwai K, Virgin HW. 2018. HOIL1 Is Essential for the  
1146 Induction of Type I and III Interferons by MDA5 and Regulates Persistent  
1147 Murine Norovirus Infection. *J Virol* 92:1–17.
- 1148 72. Precious BL, Carlos TS, Goodbourn S, Randall RE. 2007. Catalytic  
1149 turnover of STAT1 allows PIV5 to dismantle the interferon-induced anti-  
1150 viral state of cells. *Virology* 368:114–121.
- 1151 73. Huang WC, Tung SL, Chen YL, Chen PM, Chu PY. 2018. IFI44L is a novel  
1152 tumor suppressor in human hepatocellular carcinoma affecting cancer  
1153 stemness, metastasis, and drug resistance via regulating met/Src signaling  
1154 pathway. *BMC Cancer* 18:1–10.
- 1155 74. Meng X, Yang D, Yu R, Zhu H. 2015. EPSTI1 is involved in IL-28A-  
1156 mediated inhibition of HCV Infection. *Mediators Inflamm* 2015.
- 1157 75. Jans J, Unger WWJ, Vissers M, Ahout IML, Schreurs I, Wickenhagen A, de  
1158 Groot R, de Jonge MI, Ferwerda G. 2018. Siglec-1 inhibits RSV-induced  
1159 interferon gamma production by adult T cells in contrast to newborn T cells.  
1160 *Eur J Immunol* 48:621–631.
- 1161 76. McDonald JU, Kaforou M, Clare S, Hale C, Ivanova M, Huntley D, Dorner  
1162 M, Wright VJ, Levin M, Martinon-Torres F, Herberg JA, Tregoning JS.  
1163 2016. A Simple Screening Approach To Prioritize Genes for Functional  
1164 Analysis Identifies a Role for Interferon Regulatory Factor 7 in the Control  
1165 of Respiratory Syncytial Virus Disease. *mSystems* 1:e00051-16.
- 1166 77. Saxena K, Simon LM, Zeng X-L, Blutt SE, Crawford SE, Sastri NP,  
1167 Karandikar UC, Ajami NJ, Zachos NC, Kovbasnjuk O, Donowitz M, Conner  
1168 ME, Shaw CA, Estes MK. 2017. A paradox of transcriptional and functional

- 1169 innate interferon responses of human intestinal enteroids to enteric virus  
1170 infection. *Proc Natl Acad Sci* 2016;154:22.
- 1171 78. da Fonseca Ferreira-da-Silva M, Springer-Frauenhoff HM, Bohne W,  
1172 Howard JC. 2014. Identification of the Microsporidian Encephalitozoon  
1173 cuniculi as a New Target of the IFN $\gamma$ -Inducible IRG Resistance System.  
1174 *PLoS Pathog* 10:e1004449.
- 1175 79. Pilla-Moffett D, Barber MF, Taylor GA, Coers J. 2016. Interferon-inducible  
1176 GTPases in host resistance, inflammation and disease. *J Mol Biol*  
1177 428:3495–3513.
- 1178 80. Biering S, Choi J, Halstrom R, Brown H, Beatty W, Lee S, McCune B,  
1179 Dominici E, Williams L, Orchard R, Wilen C, Yamamoto M, Coers J, Taylor  
1180 G, Hwang S. 2017. Viral replication complexes are targeted by LC3-guided  
1181 interferon-inducible GTPases. *Cell Host Microbe* 22:74–85.
- 1182 81. Orchard RC, Sullender ME, Dunlap BF, Balce DR, Doench JG, Virgin HW.  
1183 2018. Identification of Antinorovirus Genes in Human Cells Using Genome-  
1184 Wide CRISPR Activation Screening. *J Virol* 93:1–12.
- 1185 82. Habjan M, Hubel P, Lacerda L, Benda C, Holze C, Eberl CH, Mann A,  
1186 Kindler E, Gil-Cruz C, Ziebuhr J, Thiel V, Pichlmair A. 2013. Sequestration  
1187 by IFIT1 Impairs Translation of 2'O-unmethylated Capped RNA. *PLoS*  
1188 *Pathog* 9:e1003663.
- 1189 83. Kumar P, Sweeney TR, Skabkin MA, Skabkina O V., Hellen CUT, Pestova  
1190 T V. 2014. Inhibition of translation by IFIT family members is determined by  
1191 their ability to interact selectively with the 5'-terminal regions of cap0-,  
1192 cap1- and 5'ppp- mRNAs. *Nucleic Acids Res* 42:3228–3245.

- 1193 84. Mears H V., Emmott E, Chaudhry Y, Hosmillo M, Goodfellow IG, Sweeney  
1194 TR. 2019. Ifit1 regulates norovirus infection and enhances the interferon  
1195 response in murine macrophage-like cells. Wellcome Open Res  
1196 4:doi.org/10.12688/wellcomeopenres.15223.1.
- 1197 85. Estes MK, Ettayebi K, Tenge VR, Murakami K, Karandikar U, Lin S, Ayyar  
1198 BV, Cortes-penfield NW, Haga K, Neill FH, Opekun AR, Broughman JR,  
1199 Zeng X, Blutt SE, Crawford SE, Ramani S, Graham DY, Atmar RL. 2019.  
1200 Human Norovirus Cultivation in Nontransformed Stem Cell-Derived Human  
1201 Intestinal Enteroid Cultures : Success and Challenges. Viruses  
1202 11:doi:10.3390/v11070638.
- 1203 86. Ettayebi K, Crawford SE, Murakami K, Broughman JR, Karandikar U,  
1204 Tenge VR, Neill FH, Blutt SE, Zeng X, Qu L, Kou B, Antone R, Burrin D,  
1205 Graham DY, Ramani S, Atmar RL, Mary K. 2016. Replication of human  
1206 noroviruses in stem cell – derived human enteroids - SUPP. Science (80- )  
1207 5211.
- 1208 87. Sherwood V, Burgert H-G, Chen Y-H, Sanghera S, Katafigiotis S, Randall  
1209 RE, Connerton I, Mellits KH. 2007. Improved growth of enteric adenovirus  
1210 type 40 in a modified cell line that can no longer respond to interferon  
1211 stimulation. J Gen Virol 88:71–6.
- 1212 88. Young DF, Andrejeva L, Livingstone A, Goodbourn S, Lamb A, Collins PL,  
1213 Elliott RM, Randall RE, Lamb RA. 2003. Virus replication in engineered  
1214 human cells that do not respond to interferons. J Virol 77:2174–2181.
- 1215 89. Lakobachvili N, Peters PJ. 2017. Humans in a Dish : The Potential of  
1216 Organoids in Modeling Immunity and Infectious Diseases. Front Microbiol

- 1217 8:1–7.
- 1218 90. Chakraborty R, Schinazi RF. 2017. Jak Inhibitors Modulate Production of  
1219 Replication-Competent Zika Virus in Human Hofbauer , Trophoblasts , and  
1220 Neuroblastoma cells 2:199–218.
- 1221 91. Good C, Wells AI, Coyne CB. 2019. Type III interferon signaling restricts  
1222 enterovirus 71 infection of goblet cells. *Sci Adv* 5:eaau4255.
- 1223 92. Chugh R, Sangwan V, Patil SP, Dudeja V, Dawra RK, Banerjee S,  
1224 Schumacher RJ, Blazar BR, Georg GI, Vickers SM, Saluja AK. 2012. A  
1225 Preclinical Evaluation of Minnelide as a Therapeutic Agent Against  
1226 Pancreatic Cancer. *Sci Transl Med* 4:156ra139.
- 1227 93. Roos-Weil D, Ambert-Balay K, Lanternier F, Mamzer-Bruneel M-F, Nochy  
1228 D, Pothier P, Avettand-Fenoel V, Anglicheau D, Snanoudj R, Bererhi L,  
1229 Thervet E, Lecuit M, Legendre C, Lortholary O, Zuber J. 2011. Impact of  
1230 norovirus/sapovirus-related diarrhea in renal transplant recipients  
1231 hospitalized for diarrhea. *Transplantation* 92:61–69.
- 1232 94. Koo HL, Dupont HL. 2009. Noroviruses as a Potential Cause of Prolonged  
1233 and Lethal Disease in Immunocompromised Patients 49:1069–1071.
- 1234 95. Abedin S, Mckenna E, Chhabra S, Pasquini M, Shah NN, Jerkins J, Baim  
1235 A, Runaas L, Longo W, Drobyski W, Hari PN, Hamadani M. 2019. Efficacy,  
1236 Toxicity, and Infectious Complications in Ruxolitinib-Treated Patients with  
1237 Corticosteroid-Refractory Graft-versus-Host Disease after Hematopoietic  
1238 Cell Transplantation. *Biol Blood Marrow Transpl* 00:1–6.
- 1239 96. Vargas-hernandez A, Mace EM, Zimmerman O, Zerbe CS, Freeman AF,  
1240 Rosenzweig S, Leiding JW, Torgerson T, Altman MC, Cunningham-rundles

1241 C, Chinn IK, Carisey AF, Hanson IC, Rider NL, Steven M, Orange JS,  
1242 Forbes LR. 2018. Ruxolitinib partially reverses functional NK cell deficiency  
1243 in patients with STAT1 gain-of-function mutations. J Allergy Clin Immunol  
1244 141:2142–2155.  
1245



A.

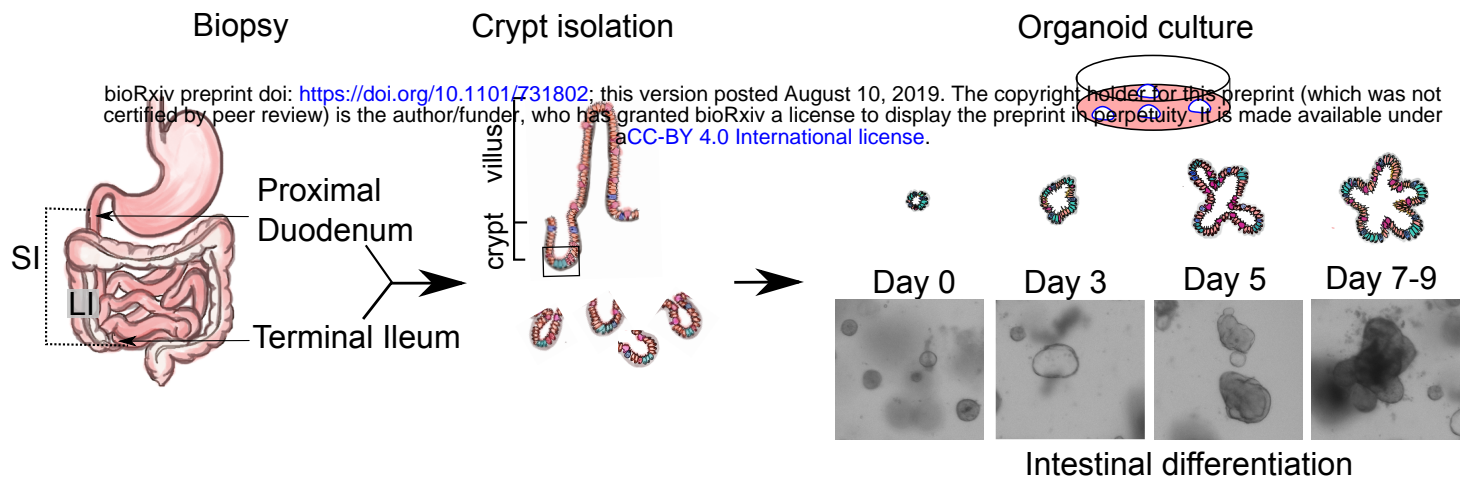

B. Proximal Duodenum (D196)

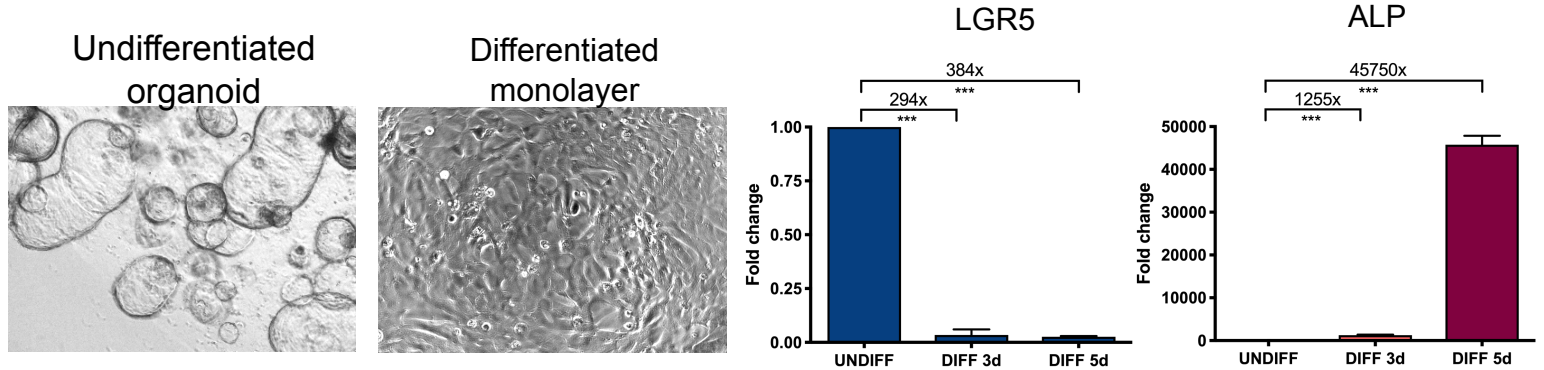

C. Terminal Ileum (TI365)

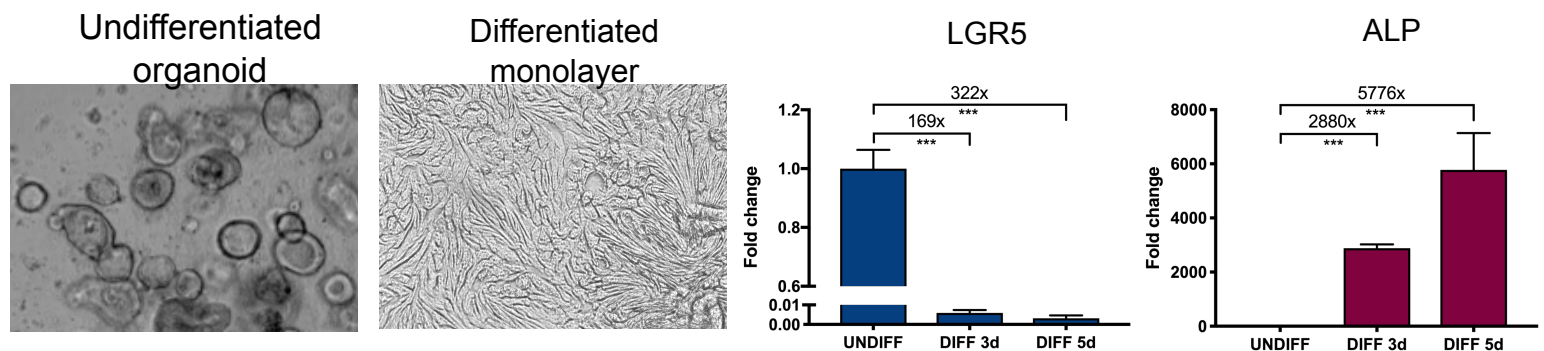

D.

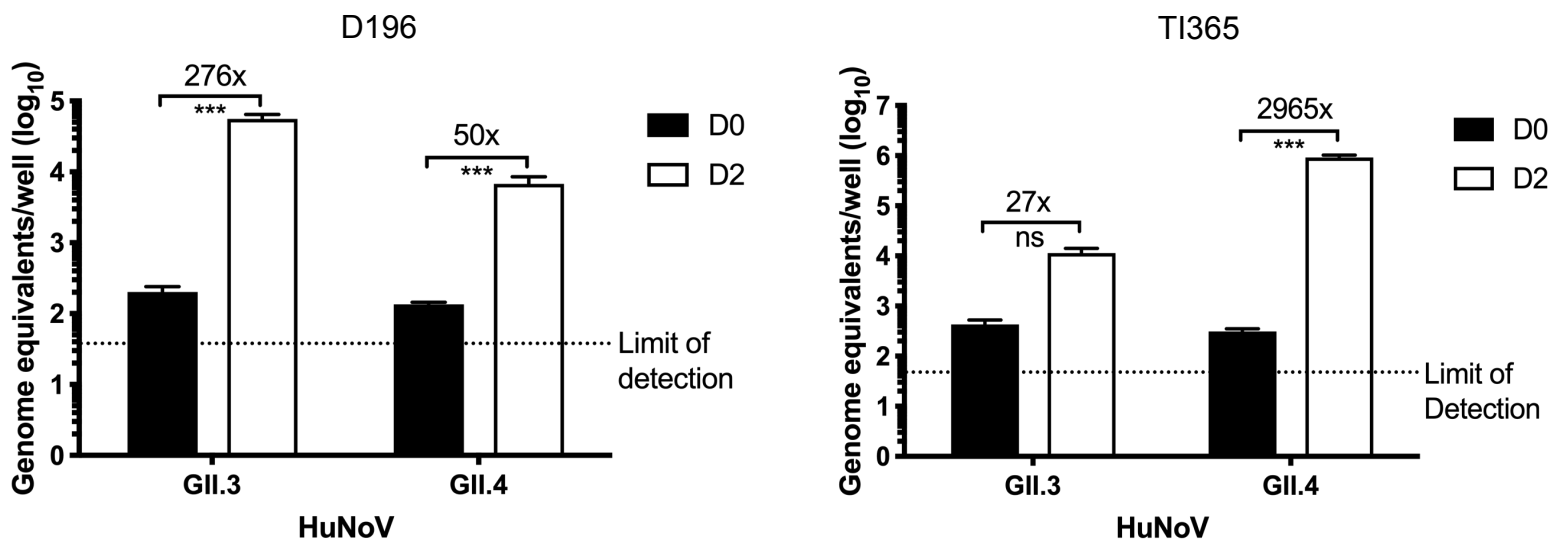

A. TI365, GII.4

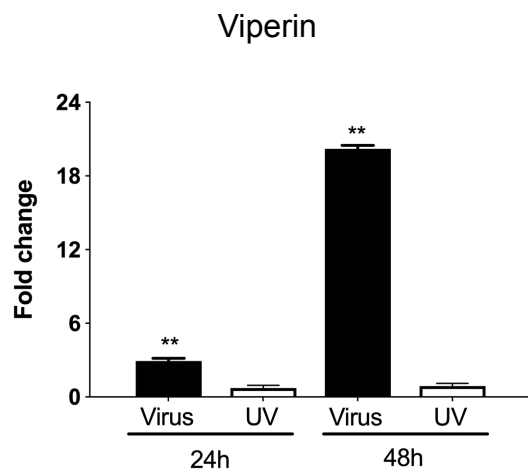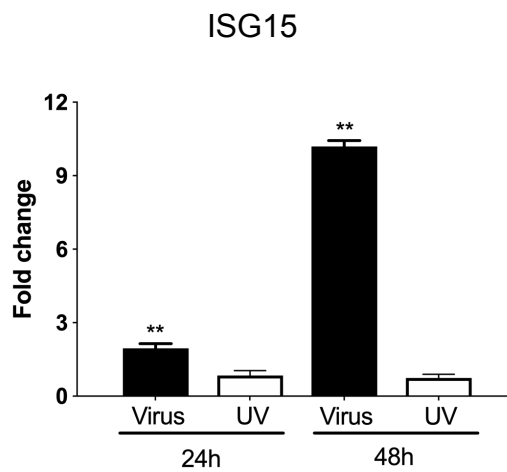

B. TI365, GII.4

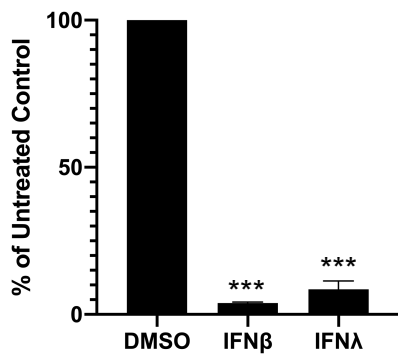

**A. TI365, GII.4**

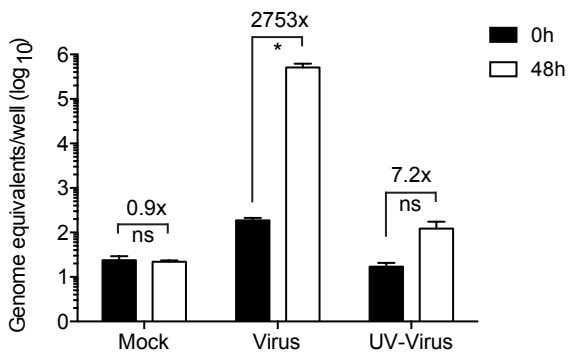

**B. aCC-BY 4.0 International TI006, GII.4**

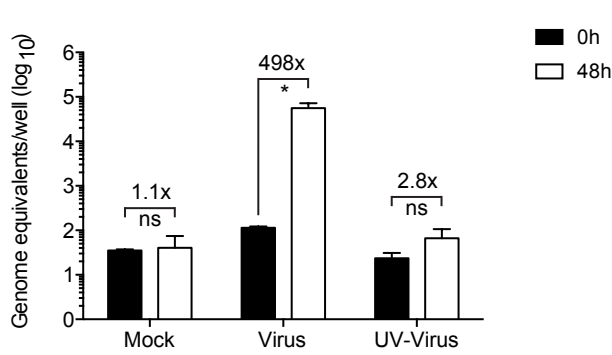

**C.**

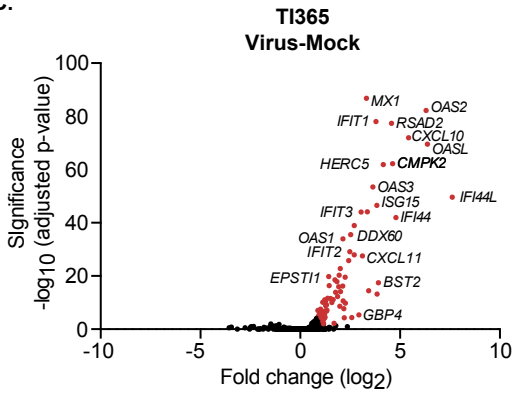

**D.**

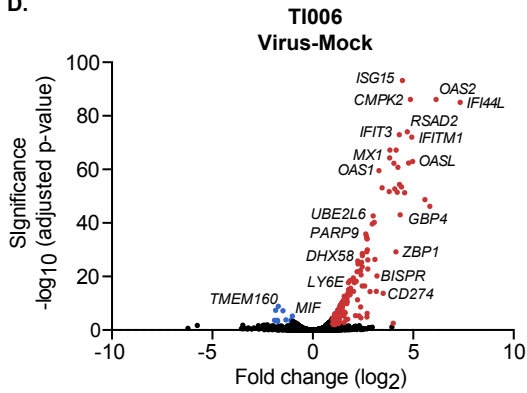

**E.**

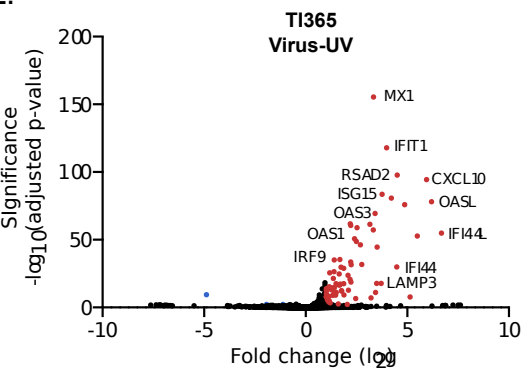

**F.**

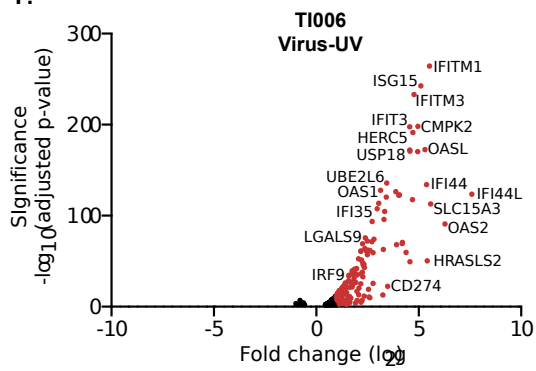

**G.**

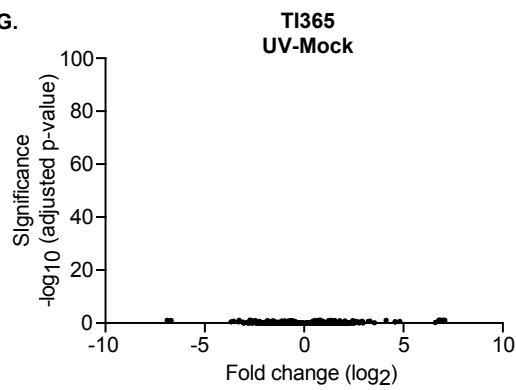

**H.**

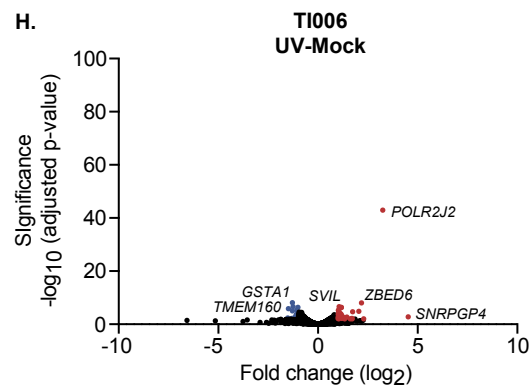

**I.**

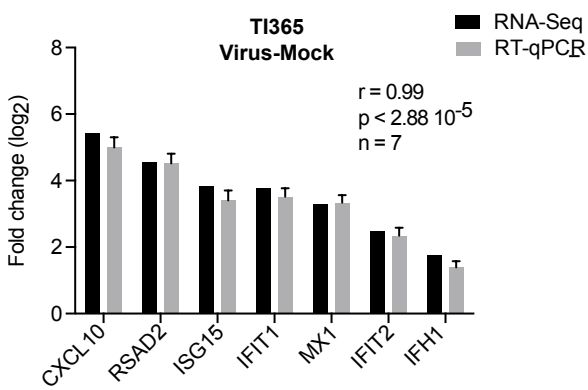

**.I.**

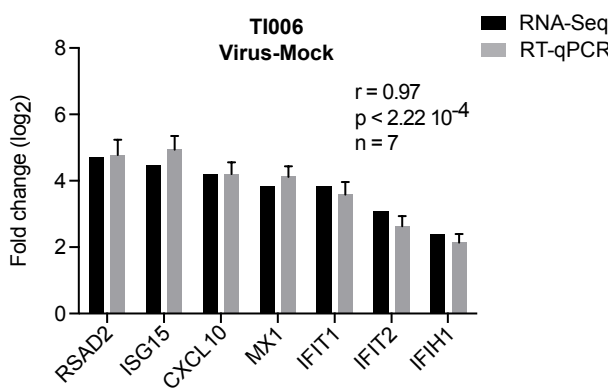

A.

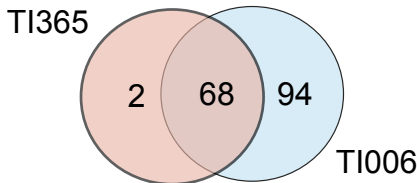

B.

| Transcription Factor | TI365    |            | TI006     |            |
|----------------------|----------|------------|-----------|------------|
|                      | FDR      | Occurrence | FDR       | Occurrence |
| STAT2                | 2.55E-69 | 47 / 70    | 1.23E-107 | 81 / 162   |
| STAT1                | 4.51E-58 | 44 / 70    | 1.98E-85  | 74 / 162   |
| IKZF1                | 2.93E-11 | 31 / 70    | 1.97E-11  | 50 / 162   |
| IRF1                 | 8.05E-10 | 43 / 70    | 7.87E-15  | 86 / 162   |
| IRF4                 | 8.34E-06 | 23 / 70    | 4.46E-07  | 41 / 162   |

C.

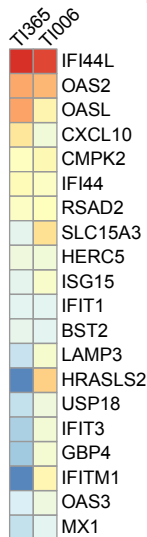

D.

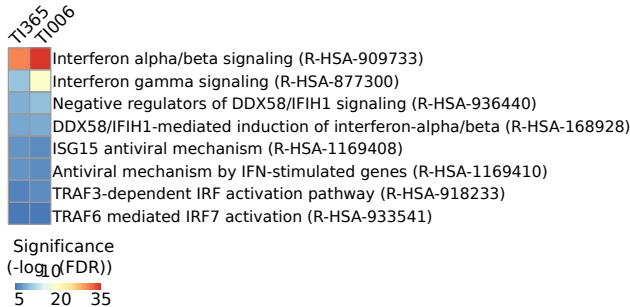

**A. D196**

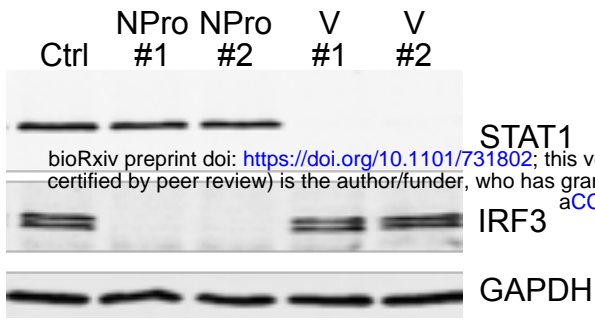

bioRxiv preprint doi: <https://doi.org/10.1101/731802>; this version posted August 10, 2019. The copyright holder for this preprint (which was not certified by peer review) is the author/funder, who has granted bioRxiv a license to display the preprint in perpetuity. It is made available under aCC-BY 4.0 International license.

**B. D196**

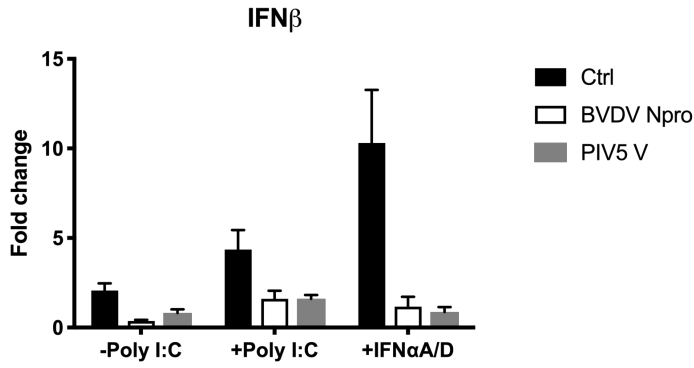

**C. D196**

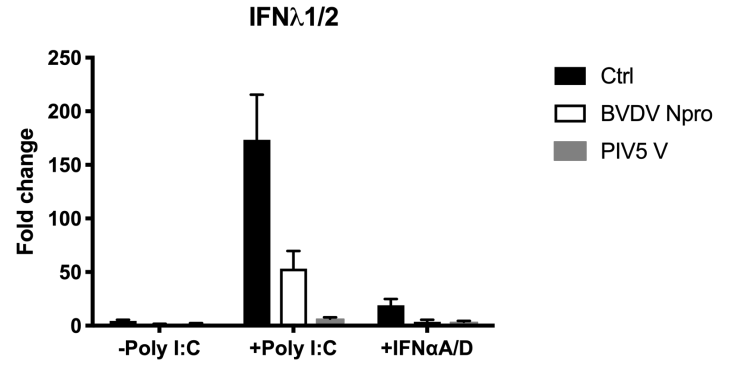

**D. D196**

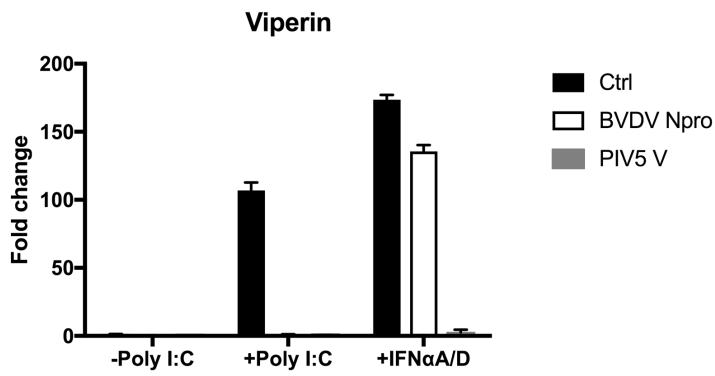

**E. D196**

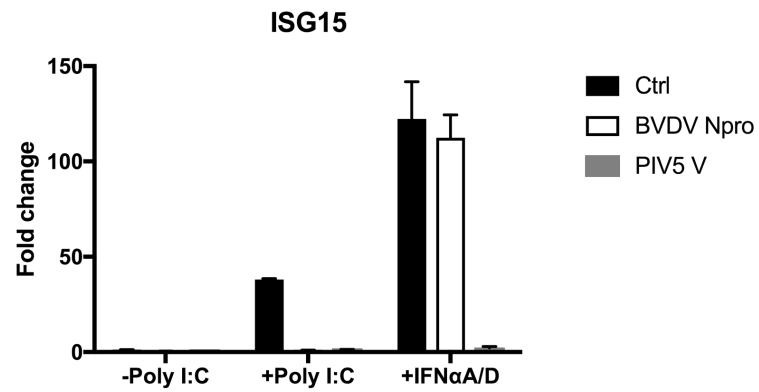

**F.**

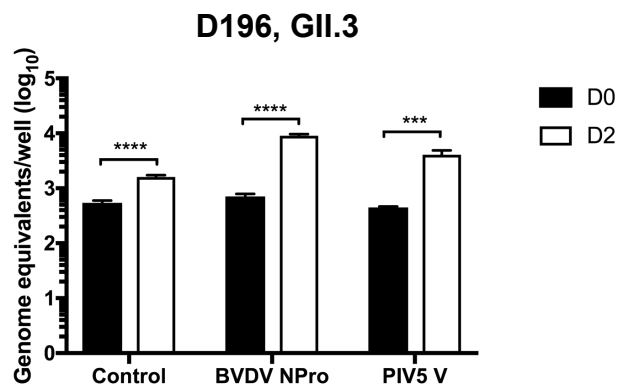

**G.**

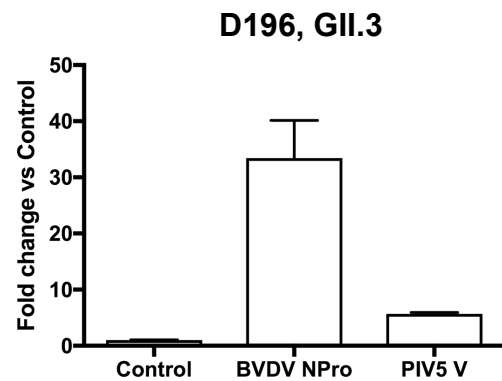

A. D196

bioRxiv preprint doi: <https://doi.org/10.1101/731802>; this version posted August 10, 2019. The copyright holder for this preprint (which was not certified by peer review) is the author/funder, who has granted bioRxiv a license to display the preprint in perpetuity. It is made available under aCC-BY 4.0 International license.

**Viperin**

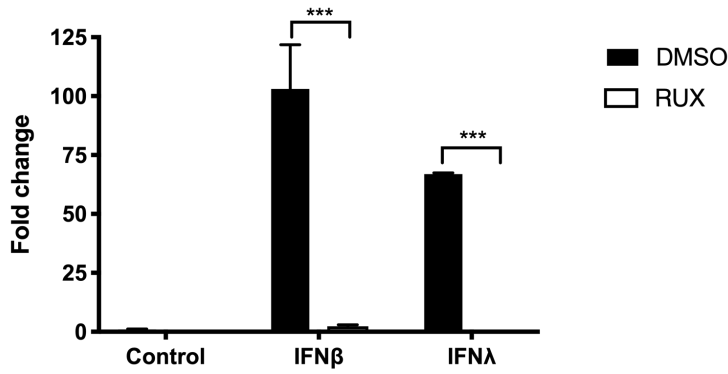

B. D196

**ISG15**

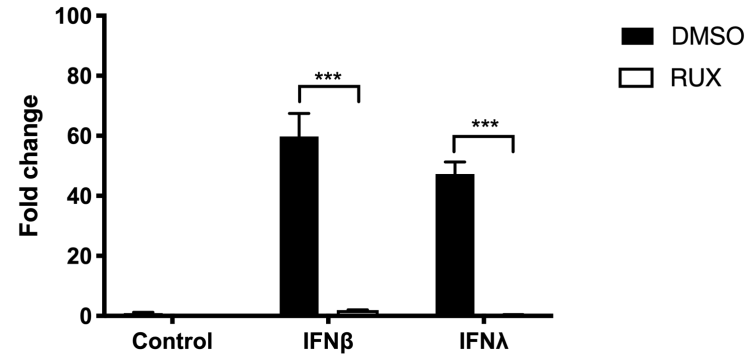

C.

D196, GII.3

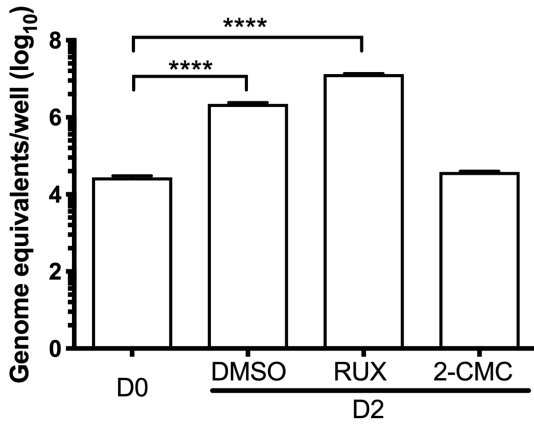

D.

D196, GII.3

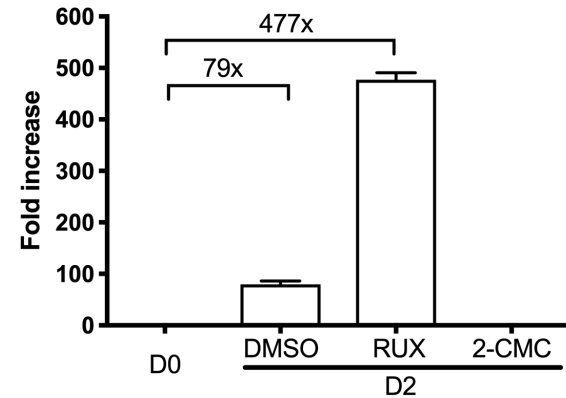

E.

TI365, GII.4

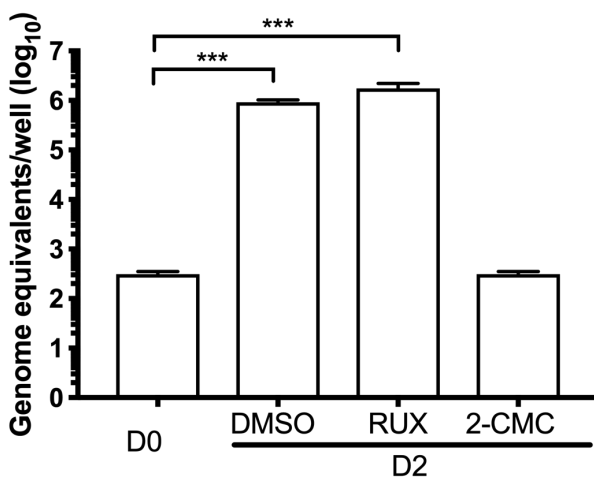

F.

TI365, GII.4

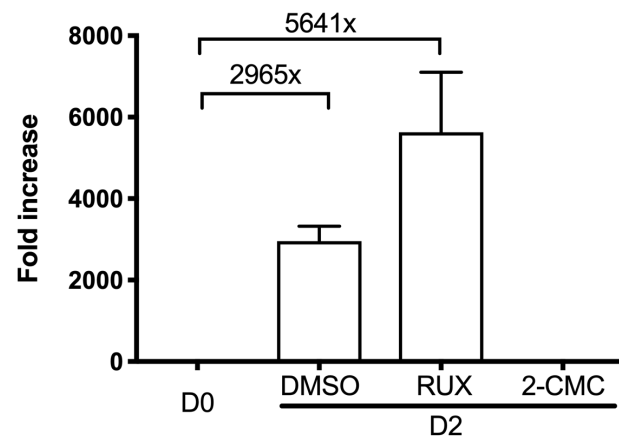

A. D421

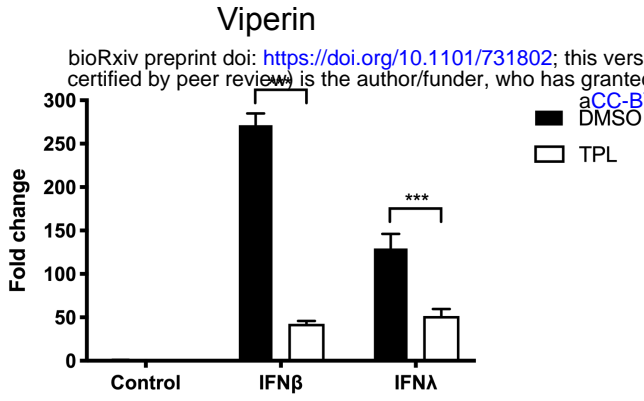

B. D421

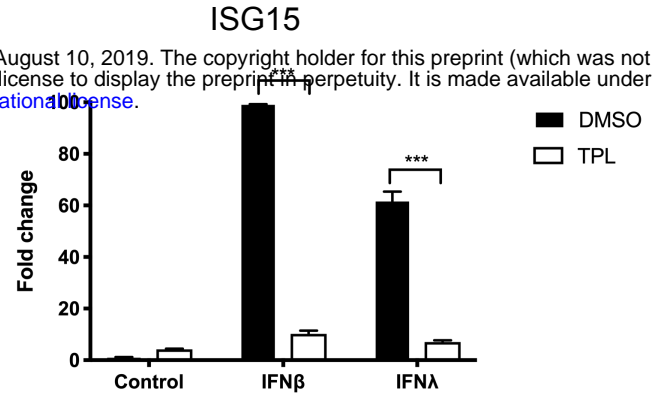

C.

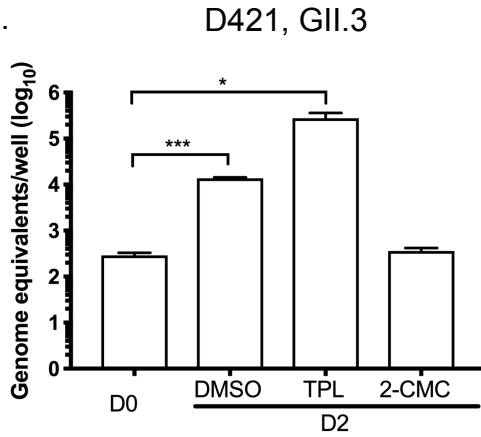

D.

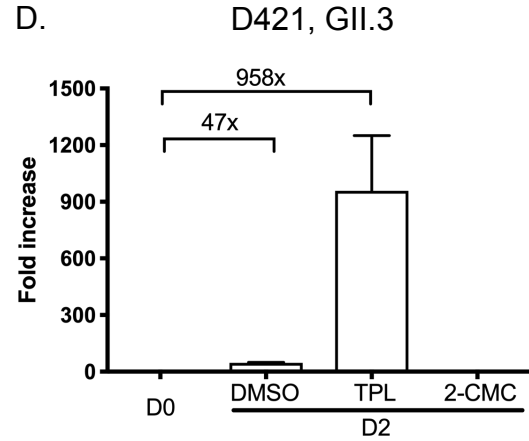

E.

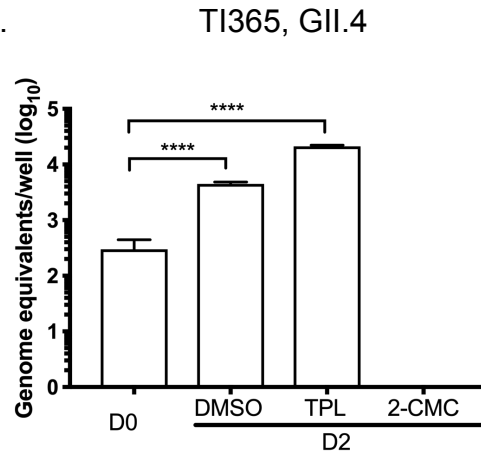

F.

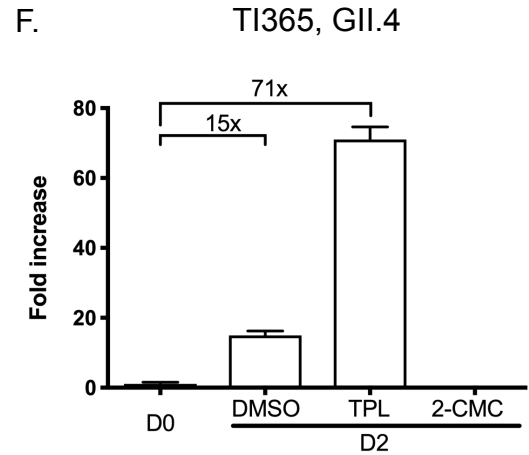

Source: https://www.biorxiv.org/content/biorxiv/early/2019/08/10/731802.full.pdf
